# Supplementary material
Source: publisher figshare collection journal article supplement (https://asha.figshare.com/articles/dataset/_/6170381)
Supplement: Supplementary file 1 [file 1]

<<SUPPLEMENTAL MATERIAL, APPENDIX A>>

**Supplemental Material Table A2.** The text (with keywords capitalized), naming syllable count, fricative and affricate count (to account for perception difficulties for those listeners with high-frequency hearing loss), rate of keyword occurrence in lexicon, and the length (in seconds) of each wave file for three talkers (SR, JC, and ER, for which audio recordings are available) for all 500 sentences.

| Sentence code (list number, sentence number) | Sentence text                             | Number of syllables | Fricative and affricate total count | Rate of keyword occurrence in lexicon (median) | Rate of keyword occurrence in lexicon (mean) | Length of audio file (seconds) |                 |                 |
|----------------------------------------------|-------------------------------------------|---------------------|-------------------------------------|------------------------------------------------|----------------------------------------------|--------------------------------|-----------------|-----------------|
|                                              |                                           |                     |                                     |                                                |                                              | SR <sup>a</sup>                | JC <sup>a</sup> | ER <sup>b</sup> |
| 0101                                         | The PARK OPENS in ELEVEN MONTHS.          | 9                   | 4                                   | 41.00                                          | 58.50                                        | 2.09                           | 1.80            | 1.58            |
| 0102                                         | The THIRSTY KID DRINKS JUICE.             | 6                   | 5                                   | 30.00                                          | 74.50                                        | 2.09                           | 1.94            | 1.66            |
| 0103                                         | These BROWN MUSHROOMS TASTE AMAZING.      | 8                   | 3                                   | 13.00                                          | 18.75                                        | 2.05                           | 2.04            | 1.76            |
| 0104                                         | The TRAIN is FAST and VERY DANGEROUS.     | 10                  | 5                                   | 47.50                                          | 242.75                                       | 2.23                           | 2.18            | 1.81            |
| 0105                                         | The ANNOYING STUDENT ASKS many QUESTIONS. | 11                  | 6                                   | 63.50                                          | 65.00                                        | 2.64                           | 2.55            | 2.06            |
| 0106                                         | The PERFORMER WEARS COLORFUL DRESSES.     | 10                  | 5                                   | 16.50                                          | 16.00                                        | 2.37                           | 2.15            | 1.86            |
| 0107                                         | A LAZY WORKER RESTS OFTEN.                | 8                   | 4                                   | 12.00                                          | 20.50                                        | 1.99                           | 1.97            | 1.75            |
| 0108                                         | My DOCTOR WORKS in that BUSY HOSPITAL.    | 11                  | 4                                   | 55.50                                          | 156.00                                       | 2.32                           | 2.16            | 1.86            |
| 0109                                         | He LOST his WHITE HAT TODAY.              | 7                   | 2                                   | 21.00                                          | 20.25                                        | 1.79                           | 1.59            | 1.40            |
| 0110                                         | The CITY SCHOOL is LARGE and CROWDED.     | 9                   | 3                                   | 126.00                                         | 181.00                                       | 2.40                           | 1.98            | 1.76            |
| 0111                                         | The WEAK PLANT is BARELY ALIVE.           | 8                   | 1                                   | 3.50                                           | 3.00                                         | 2.15                           | 1.91            | 1.74            |

|      |                                         |    |   |        |        |      |      |      |
|------|-----------------------------------------|----|---|--------|--------|------|------|------|
| 0112 | The KIDS ENJOYED the HOLIDAY PARADE.    | 10 | 3 | 118.50 | 128.00 | 2.10 | 1.83 | 1.72 |
| 0113 | The RED VEGETABLES GROW in the GARDEN.  | 10 | 3 | 55.00  | 49.00  | 2.07 | 1.87 | 1.68 |
| 0114 | The EGGS NEED MORE SALT.                | 5  | 2 | 124.50 | 339.50 | 1.64 | 1.51 | 1.39 |
| 0115 | The OLD MEN MISSED HOME.                | 5  | 2 | 118.50 | 134.00 | 1.76 | 1.67 | 1.30 |
| 0116 | The GIRL LOVES SWEET CANDY.             | 6  | 3 | 59.00  | 101.00 | 1.95 | 1.54 | 1.56 |
| 0117 | The MILK and CHEESE SMELLED HORRIBLE.   | 8  | 4 | 13.00  | 14.50  | 1.96 | 1.83 | 1.65 |
| 0118 | My GRANDMOTHER BAKED a CHOCOLATE CAKE.  | 9  | 2 | 10.00  | 13.25  | 2.09 | 2.21 | 1.74 |
| 0119 | The BRIGHT SUN WARMS the GROUND         | 6  | 2 | 7.50   | 8.00   | 1.85 | 1.63 | 1.58 |
| 0120 | His SISTER PLAYS with BEAUTIFUL TOYS.   | 9  | 5 | 84.50  | 115.50 | 2.41 | 2.10 | 1.84 |
| 0121 | The PARTY GAME was REALLY EASY.         | 9  | 1 | 87.00  | 300.25 | 1.83 | 1.81 | 1.48 |
| 0122 | Our CAT HATES TAKING a BATH.            | 7  | 3 | 96.50  | 156.50 | 2.03 | 1.88 | 1.67 |
| 0123 | The GRAY MOUSE ATE the CHEESE.          | 6  | 3 | 13.00  | 80.25  | 1.78 | 1.51 | 1.53 |
| 0124 | The BAR SELLS BEER on the WEEKEND.      | 8  | 2 | 15.50  | 17.75  | 2.17 | 1.97 | 1.87 |
| 0125 | My STRONG FATHER CARRIED my BROTHER.    | 9  | 4 | 58.00  | 61.00  | 2.33 | 2.20 | 1.83 |
| 0201 | The TWINS LIVE WITH their GRANDPARENTS. | 8  | 4 | 282.00 | 390.25 | 2.30 | 1.87 | 1.76 |
| 0202 | Some PEOPLE DRINK BLACK COFFEE.         | 7  | 1 | 44.00  | 327.25 | 2.05 | 1.91 | 1.71 |
| 0203 | The WOMAN MET her FAVORITE ACTOR.       | 9  | 2 | 67.00  | 54.75  | 1.93 | 1.97 | 1.62 |
| 0204 | That BRIGHT LIGHT SEEMS FAR away.       | 7  | 2 | 11.00  | 14.75  | 2.14 | 1.85 | 1.67 |

|      |                                                   |    |   |        |         |      |      |      |
|------|---------------------------------------------------|----|---|--------|---------|------|------|------|
| 0205 | The GLASS DISH BROKE in the KITCHEN.              | 8  | 3 | 18.00  | 23.00   | 1.97 | 2.02 | 1.63 |
| 0206 | My COUSIN OWNED a SILVER CAR.                     | 8  | 3 | 60.50  | 53.50   | 1.86 | 1.84 | 1.57 |
| 0207 | The YOUNG PERFORMER LEARNED to SING.              | 8  | 2 | 100.50 | 114.75  | 1.93 | 2.04 | 1.67 |
| 0208 | The PROFESSORS WRITE SIMPLE PROBLEMS.             | 9  | 5 | 50.50  | 55.00   | 2.10 | 2.21 | 1.88 |
| 0209 | The BROWN BEARS EAT FRUIT.                        | 5  | 2 | 8.00   | 78.00   | 1.68 | 1.57 | 1.56 |
| 0210 | The COUPLE KISSED AFTER DINNER.                   | 8  | 2 | 58.00  | 75.75   | 1.76 | 1.74 | 1.48 |
| 0211 | The EXCITED TEENAGER was REALLY NOISY.            | 12 | 3 | 12.50  | 250.50  | 2.72 | 2.34 | 1.99 |
| 0212 | The PLAYERS FORGOT to bring LUNCH AGAIN.          | 10 | 3 | 58.50  | 111.25  | 2.17 | 1.88 | 1.77 |
| 0213 | The WEIRD NOISE UPSET the BABY.                   | 8  | 2 | 16.00  | 21.50   | 1.91 | 1.63 | 1.57 |
| 0214 | The LADY WALKED DOWN the STREET.                  | 7  | 1 | 70.50  | 56.25   | 1.72 | 1.49 | 1.52 |
| 0215 | The LOST DOG was HUNGRY and THIRSTY.              | 9  | 4 | 13.50  | 63.25   | 2.45 | 2.02 | 1.69 |
| 0216 | The SCARY MONKEY CHASED the CHILD.                | 8  | 4 | 13.50  | 65.50   | 2.23 | 2.12 | 1.68 |
| 0217 | Our SHY NEIGHBORS AVOID PEOPLE.                   | 8  | 3 | 8.00   | 307.25  | 2.00 | 1.90 | 1.73 |
| 0218 | The FRUIT and SALAD TASTE FRESH.                  | 7  | 5 | 21.00  | 19.50   | 2.14 | 2.07 | 1.74 |
| 0219 | Her LOUD COUGH SOUNDED HORRIBLE.                  | 8  | 3 | 8.50   | 10.25   | 2.03 | 2.07 | 1.58 |
| 0220 | Her GRANDPARENTS are SERIOUS AND SOMETIMES CRUEL. | 12 | 5 | 30.50  | 211.25  | 2.88 | 2.66 | 2.33 |
| 0221 | The FIVE STUDENTS were LATE for CLASS.            | 8  | 5 | 125.00 | 118.50  | 2.19 | 2.35 | 1.81 |
| 0222 | The PRIVATE UNIVERSITY is NOT CHEAP.              | 11 | 4 | 62.50  | 1012.25 | 2.29 | 2.08 | 1.71 |

|      |                                              |    |   |        |        |      |      |      |
|------|----------------------------------------------|----|---|--------|--------|------|------|------|
| 0223 | The PLANE will LAND in TEN MINUTES.          | 8  | 1 | 24.50  | 36.25  | 1.87 | 1.89 | 1.63 |
| 0224 | Our FATHER WORKS in a LARGE OFFICE.          | 9  | 6 | 62.50  | 154.50 | 2.18 | 2.13 | 1.86 |
| 0225 | The TOURIST TRAVELED MANY PLACES.            | 9  | 4 | 274.00 | 224.00 | 2.03 | 1.81 | 1.78 |
| 0301 | That STORE SELLS CHEAP CLOTHES.              | 5  | 5 | 106.50 | 94.00  | 2.16 | 1.90 | 1.70 |
| 0302 | My PUPPY CHASES CATS in the PARK.            | 9  | 4 | 23.00  | 41.25  | 2.20 | 2.08 | 1.82 |
| 0303 | The CHRISTMAS TREE LOOKS WONDERFUL.          | 8  | 4 | 71.00  | 68.25  | 2.02 | 1.89 | 1.50 |
| 0304 | The WAITER TOOK SHORT BREAKS.                | 6  | 2 | 25.00  | 121.50 | 1.69 | 1.75 | 1.50 |
| 0305 | A BIG BEAR SCARED the VISITORS.              | 8  | 4 | 53.50  | 114.00 | 1.91 | 1.86 | 1.61 |
| 0306 | The KING and QUEEN PLANNED a PARTY.          | 8  | 0 | 41.00  | 40.75  | 2.04 | 1.81 | 1.58 |
| 0307 | The ORANGE FIRE BURNED BRIGHTLY.             | 8  | 2 | 2.50   | 3.00   | 1.96 | 1.81 | 1.73 |
| 0308 | The HUNGRY TEENAGERS EAT SNACKS.             | 8  | 5 | 9.50   | 78.50  | 2.05 | 2.05 | 1.90 |
| 0309 | The RABBIT and MOUSE EXPLORED the FIELD.     | 9  | 3 | 3.00   | 6.00   | 2.19 | 2.20 | 2.04 |
| 0310 | The FOREIGN TOURIST was EXCITED and NERVOUS. | 12 | 5 | 12.00  | 13.25  | 2.64 | 2.43 | 2.00 |
| 0311 | This NEW COMPUTER is QUITE USEFUL.           | 9  | 2 | 33.00  | 110.50 | 2.22 | 1.87 | 1.52 |
| 0312 | The POPULAR BAND PLAYED in a CONCERT.        | 10 | 1 | 39.50  | 94.00  | 2.20 | 1.99 | 1.81 |
| 0313 | The MOTHER MADE LUNCH for her CHILDREN.      | 9  | 3 | 263.50 | 227.00 | 2.06 | 1.83 | 1.55 |
| 0314 | The OPERA THEATER is FULL this EVENING.      | 11 | 3 | 13.00  | 23.25  | 2.24 | 1.96 | 1.74 |
| 0315 | The NURSE WORKS LATE NIGHTS.                 | 5  | 3 | 76.00  | 160.00 | 1.79 | 1.58 | 1.40 |

|      |                                                 |    |   |        |        |      |      |      |
|------|-------------------------------------------------|----|---|--------|--------|------|------|------|
| 0316 | The WILD HORSE JUMPED HIGH.                     | 6  | 4 | 6.50   | 35.75  | 1.75 | 1.52 | 1.39 |
| 0317 | The BASEBALL BROKE a GLASS WINDOW.              | 8  | 2 | 18.50  | 28.25  | 1.99 | 1.83 | 1.55 |
| 0318 | A DARK SKY MEANS RAIN.                          | 5  | 2 | 5.00   | 163.50 | 1.82 | 1.63 | 1.45 |
| 0319 | The FAMILY ATE in an EXPENSIVE RESTAURANT.      | 12 | 5 | 226.50 | 247.75 | 2.54 | 2.24 | 2.09 |
| 0320 | The STRONG ARMY WON the BATTLE.                 | 8  | 1 | 5.00   | 6.75   | 1.85 | 1.71 | 1.43 |
| 0321 | My GRANDPA LOVES RED WINE.                      | 6  | 2 | 43.00  | 94.00  | 2.04 | 1.80 | 1.56 |
| 0322 | The BIRD SINGS SONGS in the MORNING.            | 8  | 4 | 42.50  | 41.50  | 2.10 | 1.82 | 1.69 |
| 0323 | The BUSINESS CREATED MANY JOBS.                 | 9  | 4 | 119.00 | 139.50 | 1.95 | 1.87 | 1.49 |
| 0324 | The BLUE BICYCLE went DOWN the PATH.            | 9  | 2 | 21.00  | 29.00  | 2.22 | 2.04 | 1.69 |
| 0325 | The CHEF ROASTS FRESH PORK.                     | 5  | 6 | 11.50  | 12.50  | 2.03 | 1.86 | 1.54 |
| 0401 | The ACTOR WORKED for SIX DAYS.                  | 7  | 3 | 260.50 | 250.00 | 2.03 | 1.95 | 1.54 |
| 0402 | The FATHER HUGS his SAD DAUGHTER.               | 8  | 5 | 50.50  | 51.25  | 1.98 | 1.94 | 1.48 |
| 0403 | The KITCHEN GARBAGE SMELLED TERRIBLE.           | 9  | 3 | 8.00   | 9.00   | 2.13 | 2.04 | 1.68 |
| 0404 | That PRESIDENT LIVES in an EXPENSIVE APARTMENT. | 13 | 6 | 101.50 | 182.75 | 2.51 | 2.31 | 2.08 |
| 0405 | A BASEBALL is HARD and PERFECTLY ROUND.         | 10 | 3 | 42.00  | 62.25  | 2.32 | 2.31 | 1.91 |
| 0406 | The RUDE JOKE UPSET my PARENTS.                 | 8  | 3 | 7.00   | 68.50  | 2.00 | 1.91 | 1.81 |
| 0407 | The WILD ANIMALS SLEEP in the FOREST.           | 11 | 4 | 29.50  | 31.00  | 2.51 | 2.37 | 1.77 |
| 0408 | The DARK NIGHT BRINGS FEAR.                     | 5  | 2 | 39.50  | 40.00  | 1.67 | 1.56 | 1.33 |

|      |                                                |    |   |        |        |      |      |      |
|------|------------------------------------------------|----|---|--------|--------|------|------|------|
| 0409 | The CHEF COOKS WONDERFUL FOOD.                 | 7  | 5 | 102.50 | 149.75 | 1.88 | 1.83 | 1.61 |
| 0410 | His FIRST GIRLFRIEND was ATTRACTIVE and SMART. | 10 | 5 | 17.50  | 65.75  | 2.38 | 2.27 | 2.08 |
| 0411 | The HUSBAND and WIFE CUT the CAKE.             | 8  | 3 | 27.00  | 30.25  | 2.04 | 2.06 | 1.58 |
| 0412 | The HOMEMADE TEA was TOO HOT.                  | 7  | 2 | 21.50  | 122.75 | 2.05 | 1.64 | 1.57 |
| 0413 | The BIRD FOUND a JUICY WORM.                   | 7  | 3 | 17.00  | 45.00  | 1.90 | 1.67 | 1.41 |
| 0414 | The TOMATO PLANT GREW by the WINDOW.           | 10 | 0 | 8.00   | 24.00  | 2.01 | 2.00 | 1.48 |
| 0415 | The STUPID GUEST is NOT WELCOME.               | 8  | 2 | 9.50   | 976.25 | 1.87 | 1.77 | 1.54 |
| 0416 | My GRANDMOTHER DRINKS COLD BEER.               | 7  | 2 | 25.50  | 28.25  | 2.04 | 2.11 | 1.59 |
| 0417 | The WORRIED ADULT RAN HOME.                    | 7  | 1 | 44.00  | 92.25  | 1.68 | 1.69 | 1.49 |
| 0418 | The NEWSPAPER COMES EVERY WEEKEND.             | 9  | 3 | 128.50 | 169.50 | 1.96 | 2.02 | 1.56 |
| 0419 | The TALENTED MUSICIAN KNOWS many SONGS.        | 11 | 5 | 155.00 | 653.00 | 2.53 | 2.55 | 1.96 |
| 0420 | The GRAY HORSE EATS GRASS.                     | 5  | 4 | 4.50   | 75.75  | 1.84 | 1.59 | 1.49 |
| 0421 | The TREES GROW SWEET APPLES.                   | 6  | 3 | 19.50  | 32.50  | 2.08 | 1.75 | 1.63 |
| 0422 | The POOR FAMILY ONLY eats RICE.                | 8  | 2 | 204.50 | 216.00 | 2.38 | 1.91 | 1.70 |
| 0423 | The CUSTOMER ENJOYED the MEAL and WINE.        | 10 | 2 | 22.00  | 31.75  | 2.39 | 2.04 | 1.82 |
| 0424 | The TWELVE CHILDREN were HIDING OUTSIDE.       | 9  | 4 | 58.00  | 89.50  | 2.43 | 2.21 | 1.95 |
| 0425 | The LAZY STUDENT FAILED the TEST.              | 8  | 4 | 13.50  | 38.75  | 2.22 | 1.91 | 1.59 |
| 0501 | Their NEPHEW RAN AROUND the HOUSE.             | 8  | 3 | 131.00 | 134.25 | 1.99 | 1.70 | 1.54 |

|      |                                         |    |   |        |        |      |      |      |
|------|-----------------------------------------|----|---|--------|--------|------|------|------|
| 0502 | The ENGLISH TEA SMELLED BAD.            | 6  | 2 | 47.00  | 130.00 | 1.97 | 1.67 | 1.52 |
| 0503 | My NEIGHBOR SINGS COUNTRY SONGS.        | 7  | 4 | 52.00  | 138.75 | 2.18 | 1.74 | 1.63 |
| 0504 | The FOOTBALL GAME ENDED EARLY.          | 8  | 1 | 36.00  | 43.25  | 1.83 | 1.54 | 1.34 |
| 0505 | The HUNGRY GIRL MADE a SANDWICH.        | 8  | 3 | 54.50  | 114.00 | 1.89 | 1.77 | 1.43 |
| 0506 | The SICK QUEEN RULED from her BED.      | 7  | 1 | 22.50  | 27.25  | 2.13 | 1.95 | 1.70 |
| 0507 | The ASSIGNMENT SEEMED SHORT and SIMPLE. | 9  | 4 | 15.50  | 13.00  | 2.30 | 1.83 | 1.67 |
| 0508 | The TINY FLY BOTHERED EVERYONE.         | 9  | 3 | 6.00   | 19.75  | 2.08 | 2.10 | 1.50 |
| 0509 | A HAPPY MARRIAGE is VERY IMPORTANT.     | 11 | 3 | 104.00 | 272.25 | 2.14 | 1.83 | 1.60 |
| 0510 | The MAN WALKED in the FOREST ALONE.     | 9  | 2 | 52.50  | 46.50  | 2.07 | 1.90 | 1.59 |
| 0511 | The YELLOW CORN was SWEET and SALTY.    | 9  | 2 | 14.50  | 20.00  | 2.31 | 1.91 | 1.68 |
| 0512 | The TIRED BABY WENT to SLEEP.           | 8  | 1 | 51.50  | 543.00 | 1.91 | 1.74 | 1.48 |
| 0513 | The POPULAR CLUB is OFTEN FULL.         | 9  | 2 | 46.00  | 44.75  | 2.04 | 1.97 | 1.72 |
| 0514 | The CAT CHASED the DIRTY MOUSE.         | 7  | 3 | 4.00   | 31.50  | 1.97 | 1.72 | 1.57 |
| 0515 | Her BUSY DAUGHTER has MANY JOBS.        | 9  | 3 | 147.00 | 161.25 | 2.24 | 1.87 | 1.69 |
| 0516 | My MOTHER BAKES DELICIOUS COOKIES.      | 9  | 5 | 13.00  | 80.25  | 2.12 | 1.88 | 1.52 |
| 0517 | The NEW STUDENT ASKED QUESTIONS.        | 7  | 5 | 103.50 | 156.50 | 1.96 | 1.91 | 1.64 |
| 0518 | The FARMER WORKS a LONG DAY.            | 7  | 2 | 272.50 | 256.50 | 1.88 | 1.52 | 1.40 |
| 0519 | The SUN SETS in the LATE AFTERNOON.     | 9  | 4 | 10.00  | 25.00  | 2.19 | 1.89 | 1.64 |

|      |                                               |    |   |        |        |      |      |      |
|------|-----------------------------------------------|----|---|--------|--------|------|------|------|
| 0520 | The HOT COFFEE BURNED the BOY.                | 7  | 2 | 37.50  | 33.50  | 1.97 | 1.71 | 1.53 |
| 0521 | The FISH SWAM SLOWLY in the LAKE.             | 8  | 4 | 22.50  | 33.00  | 2.18 | 2.15 | 1.73 |
| 0522 | The CHEF PREPARES BREAKFAST in the KITCHEN.   | 10 | 6 | 12.00  | 16.75  | 2.23 | 2.13 | 1.78 |
| 0523 | Our COUSIN STARTS SCHOOL TOMORROW.            | 8  | 4 | 131.50 | 180.75 | 2.50 | 1.79 | 1.53 |
| 0524 | The DENTIST ENJOYS CANDY at NIGHT.            | 9  | 3 | 40.00  | 40.50  | 2.11 | 1.83 | 1.66 |
| 0525 | Our PROFESSOR ANSWERS EVERY QUESTION.         | 10 | 7 | 32.50  | 76.25  | 2.47 | 2.27 | 1.80 |
| 0601 | The PLANTS and TREES LOOK BEAUTIFUL.          | 8  | 3 | 45.50  | 54.25  | 2.02 | 1.97 | 1.49 |
| 0602 | The TEAMS PLAY DIFFERENT SPORTS.              | 6  | 4 | 191.50 | 239.75 | 1.99 | 1.83 | 1.49 |
| 0603 | The WARM SUNSHINE FELT GREAT.                 | 6  | 3 | 42.50  | 62.00  | 1.82 | 1.67 | 1.53 |
| 0604 | The CUTE PUPPY RAN HOME.                      | 6  | 1 | 39.50  | 89.75  | 1.62 | 1.51 | 1.30 |
| 0605 | The STRANGE ANIMAL SCARED the BABY.           | 9  | 3 | 40.00  | 38.50  | 2.10 | 1.83 | 1.59 |
| 0606 | The WIND DAMAGED the TINY BOAT.               | 8  | 1 | 2.50   | 2.50   | 2.00 | 1.68 | 1.53 |
| 0607 | This OFFICE is COMFORTABLE and USUALLY QUIET. | 14 | 4 | 20.50  | 77.50  | 2.43 | 2.39 | 2.12 |
| 0608 | The KIND GIRL HELPS STRANGERS.                | 6  | 5 | 85.50  | 136.50 | 2.25 | 2.19 | 1.57 |
| 0609 | The SPICY CARROTS were her FAVORITE DISH.     | 11 | 6 | 66.00  | 54.75  | 2.52 | 2.19 | 1.87 |
| 0610 | The TROPICAL BEACHES are HOT and CROWDED.     | 11 | 3 | 27.50  | 35.25  | 2.39 | 2.02 | 1.87 |
| 0611 | The RESTAURANT SELLS RED WINE.                | 7  | 3 | 46.00  | 58.00  | 2.12 | 1.66 | 1.53 |
| 0612 | The OLD AUNT was ALWAYS MEAN.                 | 7  | 1 | 201.00 | 273.25 | 1.87 | 1.58 | 1.49 |

|      |                                            |    |   |        |        |      |      |      |
|------|--------------------------------------------|----|---|--------|--------|------|------|------|
| 0613 | The FAT PIG SLEPT on the FLOOR.            | 7  | 3 | 12.50  | 19.50  | 1.96 | 1.72 | 1.59 |
| 0614 | She DROVE the BUS DOWN the STREET.         | 7  | 3 | 65.00  | 62.25  | 1.99 | 1.74 | 1.72 |
| 0615 | The MUSICIAN PLAYS MANY INSTRUMENTS.       | 10 | 5 | 212.50 | 183.75 | 2.31 | 2.02 | 1.79 |
| 0616 | The BLUEBERRY PIE BAKED in the OVEN.       | 10 | 1 | 1.50   | 2.50   | 2.04 | 1.93 | 1.66 |
| 0617 | The TEENAGER LIFTED a HEAVY BOX.           | 10 | 5 | 10.00  | 15.75  | 2.06 | 1.95 | 1.78 |
| 0618 | The MATH TEST was EASY to FINISH.          | 9  | 5 | 50.50  | 56.50  | 2.21 | 1.86 | 1.66 |
| 0619 | That MAN SWIMS in the COLD WATER.          | 8  | 2 | 34.00  | 35.25  | 2.25 | 1.73 | 1.65 |
| 0620 | The BASEBALL FLEW ACROSS the FIELD.        | 8  | 4 | 11.50  | 25.25  | 2.04 | 1.92 | 1.65 |
| 0621 | The TALENTED WRITER RECEIVED an AWARD.     | 11 | 2 | 6.50   | 23.50  | 2.26 | 2.12 | 1.78 |
| 0622 | The ADULTS LEARNED to DANCE in SCHOOL.     | 8  | 3 | 173.00 | 201.50 | 2.25 | 1.85 | 1.59 |
| 0623 | The BLACK CAT CLIMBED the TREE.            | 6  | 0 | 17.00  | 39.75  | 1.98 | 1.77 | 1.51 |
| 0624 | The STARS LIT the NIGHT SKY.               | 6  | 3 | 20.50  | 31.75  | 1.85 | 1.73 | 1.47 |
| 0625 | My GRANDPARENTS TOOK PICTURES on VACATION. | 11 | 5 | 93.00  | 162.00 | 2.63 | 2.43 | 1.96 |
| 0701 | The NEIGHBOR RAN FROM the STRANGER.        | 8  | 3 | 37.00  | 147.00 | 1.91 | 1.68 | 1.36 |
| 0702 | Her THOUGHTFUL BOYFRIEND SENT FLOWERS.     | 8  | 6 | 24.50  | 22.50  | 2.07 | 1.98 | 1.74 |
| 0703 | Her BLACK SWEATER LOOKED FUNNY.            | 7  | 2 | 14.50  | 39.50  | 1.91 | 1.62 | 1.31 |
| 0704 | The MAN ATE a LARGE MEAL.                  | 6  | 1 | 40.50  | 97.75  | 1.79 | 1.46 | 1.23 |
| 0705 | The STARVING DOG SMELLED the FOOD.         | 7  | 4 | 117.50 | 156.50 | 2.30 | 1.81 | 1.56 |

|      |                                          |    |   |        |        |      |      |      |
|------|------------------------------------------|----|---|--------|--------|------|------|------|
| 0706 | A FOREIGN COUNTRY is EXCITING to VISIT.  | 12 | 4 | 45.00  | 136.00 | 2.30 | 1.97 | 1.62 |
| 0707 | The FIGHTER is STRONG and VERY BRAVE.    | 9  | 4 | 8.00   | 221.00 | 2.16 | 1.94 | 1.63 |
| 0708 | The SAD PETS NEED LOVE.                  | 5  | 3 | 149.00 | 150.75 | 1.77 | 1.54 | 1.29 |
| 0709 | His PARENTS TELL BORING STORIES.         | 8  | 3 | 74.50  | 106.25 | 2.30 | 1.88 | 1.61 |
| 0710 | The LAST YEAR was CALM and PEACEFUL.     | 8  | 3 | 44.00  | 183.25 | 2.22 | 1.94 | 1.57 |
| 0711 | That BOOK COST TEN DOLLARS.              | 6  | 2 | 68.50  | 75.75  | 2.04 | 1.74 | 1.66 |
| 0712 | A KIND WORD is ALWAYS APPRECIATED.       | 11 | 2 | 138.50 | 164.25 | 2.38 | 2.18 | 1.83 |
| 0713 | The PROUD FANS CHEERED for their TEAM.   | 7  | 3 | 14.50  | 18.00  | 2.26 | 2.02 | 1.78 |
| 0714 | The FRIED EGG was COOKED in BUTTER.      | 8  | 1 | 24.00  | 61.25  | 2.05 | 1.89 | 1.67 |
| 0715 | The NEWS was on TV EVERY MORNING.        | 10 | 3 | 47.00  | 81.50  | 2.11 | 2.00 | 1.80 |
| 0716 | The CHEF MADE FRESH NOODLES.             | 6  | 5 | 17.50  | 96.25  | 1.85 | 1.55 | 1.49 |
| 0717 | The CROWD ENJOYED the DANCING and DRUMS. | 9  | 3 | 48.00  | 51.50  | 2.47 | 2.03 | 1.90 |
| 0718 | The CHURCH GROUP INSPIRED the COMMUNITY. | 11 | 3 | 13.00  | 16.25  | 2.28 | 2.27 | 1.67 |
| 0719 | The PEOPLE SIT in the LIVING ROOM.       | 9  | 2 | 285.00 | 450.50 | 1.82 | 1.39 | 1.34 |
| 0720 | The CLEAN BEACHES have CLEAR WATER.      | 8  | 2 | 33.50  | 38.75  | 2.09 | 1.76 | 1.55 |
| 0721 | The SINGER and DANCER JOINED the ACTOR.  | 10 | 3 | 4.50   | 6.50   | 2.40 | 1.90 | 1.72 |
| 0722 | A LAZY CHILD SLEEPS OFTEN.               | 7  | 5 | 54.00  | 86.00  | 1.88 | 1.67 | 1.53 |
| 0723 | The MEAT TASTES GREAT with this SAUCE.   | 7  | 4 | 46.50  | 53.50  | 2.30 | 1.91 | 1.73 |

|      |                                            |    |   |        |        |      |      |      |
|------|--------------------------------------------|----|---|--------|--------|------|------|------|
| 0724 | The PROFESSOR READ an INTERESTING NOVEL.   | 11 | 4 | 44.50  | 45.00  | 2.24 | 1.83 | 1.70 |
| 0725 | The DRIVER EARNED MONEY YESTERDAY.         | 9  | 2 | 43.00  | 119.00 | 1.94 | 1.65 | 1.59 |
| 0801 | The COUPLES ENTERTAIN AROUND the HOLIDAYS. | 12 | 3 | 99.50  | 99.50  | 2.54 | 2.15 | 1.88 |
| 0802 | The CLOSEST BEACH was REALLY CROWDED.      | 9  | 3 | 108.50 | 301.50 | 2.07 | 1.90 | 1.60 |
| 0803 | The STEAMED CHICKEN TASTED STRANGE.        | 7  | 5 | 17.50  | 30.75  | 2.36 | 2.26 | 1.90 |
| 0804 | The WORKERS NEED BETTER EDUCATION.         | 10 | 3 | 159.50 | 136.50 | 2.13 | 1.83 | 1.59 |
| 0805 | The HAPPY PET FOUND its TOY.               | 7  | 2 | 57.00  | 66.25  | 2.18 | 1.70 | 1.42 |
| 0806 | Her APARTMENT was NEAR the PRIVATE SCHOOL. | 10 | 2 | 43.50  | 142.00 | 2.26 | 2.07 | 1.78 |
| 0807 | The YOUNGEST SISTER WATCHES TV.            | 9  | 6 | 123.50 | 119.00 | 2.17 | 2.03 | 1.69 |
| 0808 | The MAN LOST his HOUSE KEY.                | 6  | 3 | 36.00  | 86.50  | 1.81 | 1.47 | 1.41 |
| 0809 | The NEW GAME was my BIRTHDAY GIFT.         | 8  | 2 | 47.00  | 122.50 | 2.08 | 1.88 | 1.66 |
| 0810 | The DEEP OCEAN is DARK and DANGEROUS.      | 10 | 3 | 7.00   | 6.50   | 2.45 | 2.20 | 2.06 |
| 0811 | The WOODEN DOOR was HARD to CLOSE.         | 8  | 2 | 72.00  | 78.00  | 2.00 | 1.84 | 1.73 |
| 0812 | They BOUGHT THREE BLUE CARS.               | 5  | 2 | 174.00 | 167.00 | 1.74 | 1.58 | 1.45 |
| 0813 | The GRAPE JUICE SPILLED on the FLOOR.      | 7  | 4 | 4.00   | 6.25   | 2.10 | 1.67 | 1.59 |
| 0814 | The BEST EXPLANATION is OFTEN SIMPLE.      | 11 | 5 | 26.00  | 26.75  | 2.47 | 2.25 | 1.82 |
| 0815 | The TWO FRIENDS had a TERRIBLE FIGHT.      | 9  | 3 | 139.50 | 183.00 | 2.19 | 1.69 | 1.63 |
| 0816 | The RESTAURANT SERVES DUCK SOUP.           | 7  | 4 | 21.00  | 45.25  | 2.04 | 1.77 | 1.44 |

|      |                                            |    |   |        |        |      |      |      |
|------|--------------------------------------------|----|---|--------|--------|------|------|------|
| 0817 | They ATE the ENTIRE CABBAGE QUICKLY.       | 10 | 1 | 9.00   | 79.50  | 2.23 | 1.94 | 1.77 |
| 0818 | Our TEAM PRACTICES EVERY NIGHT.            | 8  | 3 | 60.00  | 95.50  | 1.85 | 1.94 | 1.60 |
| 0819 | The SCARED DOG LOSES HOPE.                 | 6  | 4 | 26.00  | 74.25  | 1.88 | 1.61 | 1.52 |
| 0820 | Our GRANDFATHER is SERIOUS and NEVER KIND. | 12 | 5 | 96.00  | 142.50 | 2.69 | 2.62 | 2.29 |
| 0821 | The SUN SHINED BRIGHTLY in JUNE            | 7  | 3 | 2.50   | 4.25   | 2.16 | 1.98 | 1.58 |
| 0822 | The LADY SINGS a BEAUTIFUL SONG.           | 9  | 4 | 52.00  | 45.00  | 2.27 | 1.73 | 1.59 |
| 0823 | That PRETTY GIRL WON a PRIZE.              | 7  | 1 | 52.50  | 67.25  | 1.86 | 1.64 | 1.52 |
| 0824 | My BROTHER SLEEPS until LATE MORNING.      | 9  | 3 | 62.50  | 69.00  | 2.16 | 1.90 | 1.65 |
| 0825 | The OLD MAID LOOKS SAD.                    | 5  | 2 | 73.00  | 83.75  | 1.92 | 1.57 | 1.44 |
| 0901 | The LAWYER STUDIED for FIVE HOURS.         | 9  | 4 | 133.50 | 111.25 | 2.26 | 2.28 | 1.75 |
| 0902 | The CITY BUS is USUALLY EARLY.             | 10 | 3 | 149.00 | 145.25 | 2.11 | 2.01 | 1.49 |
| 0903 | His GIRLFRIEND LOVES CHINESE FOOD.         | 7  | 5 | 242.00 | 224.75 | 2.15 | 1.93 | 1.67 |
| 0904 | Their FAMOUS SON DANCED WELL.              | 6  | 4 | 64.00  | 173.50 | 1.95 | 1.70 | 1.54 |
| 0905 | The LONELY LADY CALLED her FRIEND.         | 8  | 1 | 113.50 | 121.75 | 1.99 | 1.82 | 1.57 |
| 0906 | She BOUGHT a PRETTY, COLORFUL HAT.         | 9  | 2 | 100.00 | 124.75 | 2.08 | 1.81 | 1.70 |
| 0907 | Her YOUNGEST CHILD HATES FRUIT.            | 7  | 5 | 111.50 | 117.50 | 1.95 | 1.79 | 1.67 |
| 0908 | The BEST WORKER WENT on the TRIP.          | 8  | 1 | 13.50  | 519.75 | 1.96 | 2.16 | 1.62 |
| 0909 | That TINY ANIMAL is CUTE but DANGEROUS.    | 12 | 2 | 10.50  | 21.25  | 2.77 | 2.72 | 2.31 |

|      |                                           |    |   |        |        |      |      |      |
|------|-------------------------------------------|----|---|--------|--------|------|------|------|
| 0910 | Her UNCLE CRIED SOFTLY in his ROOM.       | 9  | 2 | 15.00  | 18.25  | 2.30 | 2.22 | 1.97 |
| 0911 | The CLASS LEARNED about EARTH SCIENCE.    | 8  | 4 | 67.50  | 97.00  | 2.30 | 2.03 | 1.84 |
| 0912 | The BOSS FIRED the LAZY WAITER.           | 9  | 3 | 3.00   | 3.75   | 1.98 | 1.92 | 1.47 |
| 0913 | The AUDIENCE ENJOYED the SONG and DANCE.  | 10 | 4 | 63.50  | 55.75  | 2.44 | 2.04 | 1.79 |
| 0914 | The CHEAP DRINKS ATTRACT CUSTOMERS.       | 8  | 4 | 33.00  | 37.75  | 2.24 | 2.14 | 1.73 |
| 0915 | The RICH ADULT OWNS many HOUSES.          | 9  | 5 | 45.50  | 90.25  | 2.11 | 1.81 | 1.63 |
| 0916 | The CROWD WATCHED the TALENTED PERFORMER. | 10 | 2 | 11.00  | 49.25  | 2.38 | 2.27 | 1.85 |
| 0917 | The RAIN DESTROYED SOME PLANTS.           | 6  | 3 | 3.50   | 151.00 | 2.04 | 1.63 | 1.44 |
| 0918 | The SMALL BOY SEEMED SAD.                 | 5  | 3 | 39.50  | 46.25  | 1.86 | 1.68 | 1.56 |
| 0919 | A SUMMER VACATION is ALWAYS RELAXING.     | 12 | 4 | 106.50 | 124.50 | 2.43 | 2.27 | 2.00 |
| 0920 | Some WRITERS TELL INTERESTING STORIES.    | 9  | 4 | 78.00  | 74.50  | 2.50 | 2.20 | 1.96 |
| 0921 | The BLACK BEAR was BIG and SCARY.         | 8  | 1 | 21.00  | 97.75  | 2.16 | 1.99 | 1.71 |
| 0922 | The PROFESSOR TRAVELED VERY FAR.          | 9  | 5 | 136.00 | 288.50 | 1.98 | 1.83 | 1.80 |
| 0923 | The CHILDREN PLAYED TOGETHER YESTERDAY.   | 10 | 3 | 259.50 | 211.75 | 2.05 | 2.12 | 1.71 |
| 0924 | The SPOILED POTATOES TASTED BAD.          | 9  | 3 | 34.00  | 40.00  | 2.36 | 2.19 | 1.86 |
| 0925 | She DROVE the CAR FAST and STRAIGHT.      | 7  | 4 | 41.00  | 45.00  | 2.11 | 2.03 | 1.87 |
| 1001 | The CHRISTMAS SHOW INTERESTED my SON.     | 9  | 5 | 74.50  | 75.00  | 2.18 | 1.97 | 1.87 |
| 1002 | These COLLEGES OFFER MANY COURSES.        | 10 | 5 | 122.00 | 142.00 | 2.28 | 2.06 | 1.67 |

|      |                                           |    |   |        |        |      |      |      |
|------|-------------------------------------------|----|---|--------|--------|------|------|------|
| 1003 | The BIG ROOM FELT EMPTY.                  | 6  | 1 | 92.00  | 133.50 | 1.76 | 1.45 | 1.24 |
| 1004 | The PAINTER USED SOFT BRUSHES.            | 7  | 5 | 4.00   | 105.00 | 2.08 | 2.08 | 1.76 |
| 1005 | His GRANDMA and GRANDPA HELPED the KIDS.  | 9  | 1 | 51.50  | 87.50  | 2.49 | 2.13 | 1.94 |
| 1006 | The ANGRY BEAR SCARED the CAMPERS.        | 8  | 2 | 4.50   | 9.75   | 2.26 | 1.92 | 1.77 |
| 1007 | The STRANGER SEEMED TROUBLED and UNHAPPY. | 10 | 4 | 5.50   | 6.25   | 2.56 | 2.13 | 1.93 |
| 1008 | The THIRSTY CAT DRANK MILK.               | 6  | 2 | 35.00  | 46.75  | 1.85 | 1.62 | 1.48 |
| 1009 | The YOUNG student TOOK the FINAL EXAM.    | 10 | 2 | 86.00  | 152.75 | 2.42 | 2.11 | 1.97 |
| 1010 | Her LAST BOYFRIEND was BORING and RUDE.   | 9  | 2 | 31.00  | 37.25  | 2.53 | 2.25 | 1.91 |
| 1011 | The WHITE ONION was CUT too THIN.         | 8  | 1 | 11.00  | 15.00  | 2.13 | 1.94 | 1.51 |
| 1012 | The MARKET SELLS DELICIOUS FOOD.          | 8  | 5 | 28.50  | 115.00 | 2.05 | 1.82 | 1.68 |
| 1013 | The TIRED CHILD CRIED for her MOTHER.     | 10 | 2 | 125.00 | 136.75 | 2.13 | 2.18 | 1.62 |
| 1014 | The CHEF COOKS PASTA EVERY day.           | 8  | 5 | 108.00 | 112.50 | 1.97 | 1.87 | 1.47 |
| 1015 | The BOILED FISH SMELLS BAD.               | 6  | 4 | 43.00  | 44.00  | 1.78 | 1.65 | 1.68 |
| 1016 | The NOISY GROUP ATTRACTS ATTENTION.       | 9  | 3 | 12.00  | 16.25  | 2.19 | 1.81 | 1.71 |
| 1017 | The TRAVELERS VISITED the ART MUSEUM.     | 12 | 5 | 47.00  | 85.00  | 2.00 | 1.89 | 1.86 |
| 1018 | The BIRD LAYS TINY EGGS.                  | 6  | 2 | 19.00  | 17.00  | 1.96 | 1.83 | 1.39 |
| 1019 | The GIRL PLAYED with her BEST FRIEND.     | 7  | 2 | 178.50 | 160.75 | 1.96 | 1.73 | 1.61 |
| 1020 | The LONELY DUCK SWIMS in the LAKE         | 8  | 2 | 9.50   | 11.75  | 1.88 | 1.95 | 1.66 |

|      |                                              |    |   |        |        |      |      |      |
|------|----------------------------------------------|----|---|--------|--------|------|------|------|
| 1021 | My BAGS ARRIVED EARLY at the STATION.        | 10 | 4 | 11.50  | 15.00  | 2.31 | 2.13 | 1.91 |
| 1022 | The THREE SISTERS SHARED CLOTHES.            | 6  | 7 | 115.50 | 126.50 | 2.06 | 1.72 | 1.63 |
| 1023 | My GRANDMOTHER READ the NEWSPAPER QUICKLY.   | 11 | 2 | 22.50  | 33.00  | 2.18 | 2.31 | 1.84 |
| 1024 | The MEAN TEACHER is NEVER NICE.              | 8  | 3 | 168.00 | 261.75 | 1.94 | 1.68 | 1.61 |
| 1025 | The INSTRUCTOR GAVE BOOKS to her CLASS.      | 9  | 4 | 86.50  | 88.25  | 2.18 | 2.22 | 2.03 |
| 1101 | The MEETING STARTS in TWENTY MINUTES.        | 9  | 3 | 112.00 | 114.50 | 2.17 | 1.66 | 1.58 |
| 1102 | The CUSTOMERS HATE BLACK TEA.                | 7  | 3 | 12.50  | 26.00  | 1.85 | 1.62 | 1.61 |
| 1103 | The SICK PERSON FEELS BETTER.                | 7  | 4 | 96.50  | 95.75  | 1.72 | 1.86 | 1.33 |
| 1104 | That BROWN BIRD is ALWAYS HERE.              | 7  | 2 | 121.00 | 258.50 | 1.94 | 1.57 | 1.72 |
| 1105 | The THREE COUSINS did their MATH HOMEWORK.   | 9  | 5 | 54.00  | 96.25  | 2.21 | 1.97 | 1.78 |
| 1106 | The DARK CLOUD COVERED the SKY.              | 7  | 2 | 5.00   | 6.00   | 1.95 | 1.95 | 1.52 |
| 1107 | The GROCERY STORE SELLS FOOD.                | 7  | 5 | 94.00  | 147.75 | 1.88 | 1.78 | 1.55 |
| 1108 | The MOVIE STARTED in the SMALL ROOM.         | 9  | 3 | 105.50 | 108.00 | 1.98 | 1.92 | 1.79 |
| 1109 | The CHICKEN SOUP was a TASTY MEAL.           | 9  | 3 | 32.00  | 37.75  | 2.11 | 1.85 | 1.73 |
| 1110 | The COOL NIGHT was COMFORTABLE and RELAXING. | 11 | 2 | 45.00  | 47.00  | 2.30 | 2.30 | 1.84 |
| 1111 | The BIRTHDAY CARD was SENT LATE.             | 7  | 2 | 55.50  | 53.00  | 1.72 | 1.45 | 1.52 |
| 1112 | The SECRETARY LEARNED SPANISH EASILY.        | 11 | 4 | 96.00  | 111.00 | 2.42 | 2.03 | 1.99 |
| 1113 | The WHITE HORSE LIVES on a FARM.             | 7  | 5 | 39.50  | 150.25 | 1.85 | 1.83 | 1.85 |

|      |                                                     |    |   |        |        |      |      |      |
|------|-----------------------------------------------------|----|---|--------|--------|------|------|------|
| 1114 | Our APARTMENT NEEDS MORE WINDOWS.                   | 8  | 3 | 134.00 | 342.50 | 1.90 | 1.81 | 1.86 |
| 1115 | Our MOTHER DRINKS ORANGE JUICE.                     | 7  | 5 | 30.00  | 89.00  | 1.81 | 2.00 | 1.54 |
| 1116 | The DANGEROUS SNAKE BIT the RABBIT.                 | 9  | 3 | 9.50   | 36.00  | 1.93 | 1.87 | 1.65 |
| 1117 | The PROFESSOR GAVE an UNFAIR GRADE.                 | 9  | 4 | 34.00  | 61.50  | 2.13 | 2.10 | 1.87 |
| 1118 | They PLAYED FAST MUSIC on the RADIO.                | 10 | 3 | 148.00 | 148.25 | 2.14 | 2.11 | 1.85 |
| 1119 | That ENGLISH TEST was REALLY DIFFICULT.             | 10 | 3 | 263.50 | 380.50 | 1.98 | 1.98 | 1.78 |
| 1120 | The BOYFRIEND and GIRLFRIEND PLANNED their WEDDING. | 10 | 2 | 28.00  | 25.25  | 2.20 | 2.30 | 2.03 |
| 1121 | The KIDS SCREAMED LOUDLY in the PARK.               | 8  | 2 | 26.50  | 74.50  | 1.98 | 2.42 | 1.61 |
| 1122 | The TROUBLED SON STOLE MONEY.                       | 7  | 2 | 20.00  | 107.00 | 1.91 | 1.66 | 1.52 |
| 1123 | His SISTER BUYS CAKE DAILY.                         | 7  | 2 | 56.50  | 103.00 | 1.99 | 1.70 | 1.66 |
| 1124 | A LITTLE KITTEN CLIMBED over the FENCE.             | 10 | 2 | 5.00   | 73.25  | 2.22 | 1.88 | 1.85 |
| 1125 | The SNOWMAN had TWO GREEN GLOVES.                   | 7  | 3 | 12.00  | 115.25 | 2.17 | 2.16 | 1.96 |
| 1201 | The BALL ROLLED DOWN the HILL.                      | 6  | 1 | 14.00  | 27.75  | 1.66 | 1.77 | 1.22 |
| 1202 | The BEDROOM RUG had a LARGE STAIN.                  | 8  | 2 | 2.50   | 5.25   | 2.22 | 2.09 | 1.97 |
| 1203 | This EXPENSIVE DINNER TASTES GREAT.                 | 8  | 5 | 74.00  | 82.25  | 2.14 | 1.88 | 1.70 |
| 1204 | The DOCTOR HELPED the SICK PATIENT.                 | 8  | 3 | 49.50  | 42.75  | 1.99 | 1.87 | 1.50 |
| 1205 | Those CUTE ANIMALS CHEWED the PLANTS.               | 8  | 3 | 7.00   | 19.00  | 2.24 | 2.11 | 1.77 |
| 1206 | The GIRL PICKS PRETTY FLOWERS.                      | 7  | 3 | 59.00  | 73.25  | 1.95 | 1.79 | 1.70 |

|      |                                            |    |   |        |        |      |      |      |
|------|--------------------------------------------|----|---|--------|--------|------|------|------|
| 1207 | The BUSY FARMER GROWS POTATOES.            | 9  | 4 | 44.00  | 52.00  | 2.03 | 1.91 | 1.62 |
| 1208 | My BROTHER and SISTER RECEIVED GIFTS.      | 9  | 7 | 62.00  | 62.00  | 2.37 | 2.08 | 1.89 |
| 1209 | The INTERNATIONAL BUSINESS FAILED QUICKLY. | 11 | 4 | 8.50   | 11.75  | 2.33 | 1.98 | 1.81 |
| 1210 | The STRONG WIND COOLED the AIR.            | 6  | 1 | 10.50  | 10.50  | 1.99 | 1.84 | 1.75 |
| 1211 | The TERRIBLE CUSTOMER was LOUD and ANGRY.  | 12 | 1 | 11.00  | 9.50   | 2.30 | 2.18 | 1.95 |
| 1212 | Her YOUNGEST SON was ALWAYS UPSET.         | 9  | 4 | 89.00  | 99.25  | 2.20 | 1.77 | 1.61 |
| 1213 | My YELLOW SHOES CAME in a BAG.             | 8  | 2 | 30.00  | 121.75 | 2.07 | 2.12 | 1.62 |
| 1214 | The RATS RAN through the DARK STREETS.     | 7  | 3 | 35.00  | 34.75  | 2.26 | 1.92 | 1.64 |
| 1215 | The GOAT EATS DRY LEAVES.                  | 5  | 3 | 23.50  | 86.00  | 1.89 | 1.58 | 1.58 |
| 1216 | The FAT BUNNY LOVES CARROTS.               | 7  | 4 | 3.50   | 72.75  | 1.97 | 1.59 | 1.41 |
| 1217 | She WASHED and DRIED her CURLY HAIR.       | 8  | 2 | 8.00   | 8.25   | 2.19 | 2.14 | 1.89 |
| 1218 | The MAP SHOWS the CITY ROADS.              | 7  | 4 | 39.00  | 79.25  | 1.94 | 1.75 | 1.59 |
| 1219 | The HONEST MOTHER is LOVING and NICE.      | 10 | 4 | 220.00 | 186.75 | 2.22 | 1.93 | 1.92 |
| 1220 | The HAPPY CHILDREN LAUGH at the STORY.     | 10 | 4 | 33.00  | 79.50  | 2.08 | 1.93 | 1.72 |
| 1221 | Her UNCLE WAITS QUIETLY for the ANSWER.    | 11 | 2 | 30.00  | 31.00  | 2.40 | 2.22 | 2.00 |
| 1222 | They TOOK a SCHOOL PICTURE every YEAR.     | 9  | 2 | 445.00 | 390.50 | 2.09 | 2.12 | 1.59 |
| 1223 | The SHOPPER BOUGHT MANY THINGS.            | 7  | 3 | 303.50 | 298.50 | 1.84 | 1.78 | 1.50 |
| 1224 | The AIRPLANE FLEW in the BLUE SKY.         | 8  | 2 | 5.50   | 9.75   | 2.09 | 2.11 | 1.68 |

|      |                                                 |    |   |        |         |      |      |      |
|------|-------------------------------------------------|----|---|--------|---------|------|------|------|
| 1225 | The CHEF BOILED CARROTS in the KITCHEN.         | 10 | 4 | 4.50   | 5.25    | 2.07 | 1.88 | 1.58 |
| 1301 | The STUDENTS WALKED AROUND the CAMPUS.          | 9  | 3 | 101.00 | 101.25  | 2.13 | 2.22 | 1.73 |
| 1302 | Our CHILDREN LOVE GREEN VEGETABLES.             | 8  | 4 | 133.00 | 143.50  | 2.13 | 2.06 | 1.78 |
| 1303 | Her FAVORITE PANTS WERE RUINED.                 | 7  | 3 | 45.50  | 2647.75 | 1.77 | 1.62 | 1.46 |
| 1304 | The BOSS ASSIGNED a DIFFICULT PROJECT.          | 10 | 4 | 4.00   | 27.25   | 2.50 | 2.22 | 1.77 |
| 1305 | Their PETS LOOKED LOST and SAD.                 | 6  | 3 | 48.00  | 60.50   | 2.14 | 1.82 | 1.64 |
| 1306 | The METAL KEY OPENED the DOOR.                  | 8  | 0 | 8.50   | 15.25   | 1.80 | 1.80 | 1.40 |
| 1307 | Her BOYFRIEND WATCHED MOVIES with another GIRL. | 11 | 4 | 109.50 | 106.25  | 2.53 | 2.49 | 1.96 |
| 1308 | The OLD GARBAGE ATTRACTS FLIES.                 | 7  | 4 | 6.00   | 50.50   | 2.25 | 1.84 | 1.79 |
| 1309 | The WHITE and BROWN DOG was FRIENDLY.           | 8  | 1 | 24.00  | 69.00   | 2.04 | 1.95 | 1.65 |
| 1310 | Their FIRST DATE was FUN and ROMANTIC.          | 9  | 3 | 92.50  | 105.25  | 2.40 | 2.15 | 1.78 |
| 1311 | The KITTEN SAT on the WOODEN CHAIR.             | 9  | 2 | 5.50   | 16.50   | 1.90 | 1.95 | 1.61 |
| 1312 | A LONELY PERSON is USUALLY UNHAPPY.             | 12 | 3 | 128.00 | 366.50  | 2.31 | 2.29 | 1.77 |
| 1313 | The PARTY LASTED for THREE HOURS.               | 9  | 3 | 99.50  | 126.75  | 2.05 | 1.81 | 1.85 |
| 1314 | The TENNIS TEAM PRACTICED at NIGHT.             | 8  | 2 | 38.00  | 47.50   | 1.95 | 1.71 | 1.57 |
| 1315 | Those STORES SELL SPORTS CLOTHES.               | 5  | 7 | 114.00 | 97.75   | 2.31 | 1.91 | 1.85 |
| 1316 | Her LOUD VOICE SOUNDS BAD.                      | 5  | 4 | 15.00  | 30.00   | 1.95 | 1.68 | 1.52 |
| 1317 | The MACHINE MADE a TERRIBLE NOISE.              | 9  | 2 | 13.50  | 94.00   | 2.14 | 1.91 | 1.65 |

|      |                                             |    |   |        |        |      |      |      |
|------|---------------------------------------------|----|---|--------|--------|------|------|------|
| 1318 | The TRAIN STATION is UNDERGROUND and DIRTY. | 11 | 2 | 5.50   | 17.50  | 2.53 | 2.28 | 1.92 |
| 1319 | The PASTA BOILED in the HOT WATER.          | 10 | 2 | 29.50  | 27.00  | 1.92 | 1.78 | 1.58 |
| 1320 | The FLAGS FLY HIGH and PROUD.               | 6  | 4 | 32.50  | 48.75  | 1.96 | 1.79 | 1.70 |
| 1321 | The SHOW ENDED EARLY TODAY.                 | 8  | 1 | 33.00  | 40.00  | 1.78 | 1.49 | 1.45 |
| 1322 | A GOOD FRIEND TELLS the TRUTH.              | 6  | 3 | 189.50 | 242.50 | 1.78 | 1.65 | 1.53 |
| 1323 | The FAMILY LISTENS to CLASSICAL MUSIC.      | 12 | 5 | 174.00 | 189.50 | 2.40 | 2.15 | 1.81 |
| 1324 | This MEAL NEEDS SALT and PEPPER.            | 7  | 2 | 21.50  | 69.50  | 2.06 | 1.68 | 1.53 |
| 1325 | The ARTIST VISITED MANY MUSEUMS.            | 11 | 5 | 45.50  | 102.25 | 2.26 | 2.17 | 1.97 |
| 1401 | The PICTURE HUNG ABOVE the DOOR.            | 8  | 3 | 19.50  | 24.50  | 1.96 | 1.68 | 1.43 |
| 1402 | They BOUGHT CLOTHING at the BUSY STORE.     | 9  | 3 | 139.50 | 154.25 | 2.08 | 1.90 | 1.72 |
| 1403 | The GREEN PLANTS LOOK HEALTHY.              | 6  | 3 | 16.50  | 39.75  | 1.78 | 1.74 | 1.47 |
| 1404 | My COUSIN BAKED me a BIRTHDAY CAKE.         | 9  | 2 | 17.50  | 26.75  | 2.14 | 1.96 | 1.72 |
| 1405 | The SLOW COMPUTER had MANY PROBLEMS.        | 10 | 2 | 70.00  | 117.75 | 2.26 | 2.16 | 1.93 |
| 1406 | The STUDENT STUDIES in the QUIET ROOM.      | 10 | 3 | 74.00  | 84.25  | 2.17 | 2.15 | 1.74 |
| 1407 | The LARGE FAMILY EXPECTED VISITORS.         | 10 | 6 | 50.00  | 130.00 | 2.25 | 2.35 | 1.75 |
| 1408 | The DOG CHASED FOUR RABBITS.                | 6  | 4 | 69.00  | 91.50  | 1.94 | 1.93 | 1.64 |
| 1409 | The SMALL FISH MARKET is CLEAN.             | 7  | 3 | 57.50  | 57.75  | 1.86 | 1.78 | 1.71 |
| 1410 | Their YOUNGEST DAUGHTER is TALL and THIN.   | 9  | 2 | 43.50  | 58.75  | 2.19 | 1.84 | 1.88 |

|      |                                               |    |   |        |        |      |      |      |
|------|-----------------------------------------------|----|---|--------|--------|------|------|------|
| 1411 | The MAN ATE FRIED CHICKEN.                    | 6  | 2 | 65.50  | 112.00 | 1.68 | 1.39 | 1.42 |
| 1412 | That NEW BOOK is REALLY HELPFUL.              | 8  | 2 | 211.00 | 349.75 | 2.08 | 1.66 | 1.60 |
| 1413 | The RESTAURANT SERVES DINNER and DRINKS.      | 9  | 5 | 65.00  | 67.25  | 2.35 | 1.90 | 1.89 |
| 1414 | The FOREIGN LADY DREAMED of her HOME.         | 9  | 2 | 10.00  | 76.25  | 1.99 | 1.82 | 1.74 |
| 1415 | The BOSS TELLS HORRIBLE JOKES.                | 7  | 5 | 9.00   | 36.00  | 1.99 | 1.70 | 1.75 |
| 1416 | The LITTLE GIRL was ANGRY TODAY.              | 9  | 0 | 60.50  | 101.00 | 1.90 | 1.53 | 1.47 |
| 1417 | The COUPLE LIVES a PEACEFUL LIFE.             | 8  | 5 | 70.00  | 164.25 | 1.85 | 1.80 | 1.59 |
| 1418 | The HAPPY MONKEY SWINGS from the TREE.        | 9  | 3 | 19.00  | 19.75  | 2.07 | 1.87 | 1.71 |
| 1419 | The CLUB MEMBERS PLAYED SPORTS.               | 6  | 3 | 67.00  | 107.25 | 1.91 | 1.70 | 1.58 |
| 1420 | My PARENTS and GRANDPARENTS TRUST the POLICE. | 11 | 4 | 26.50  | 77.75  | 2.59 | 2.39 | 2.26 |
| 1421 | The PERSON SOLD her HOUSE YESTERDAY.          | 9  | 5 | 141.00 | 373.50 | 2.02 | 2.17 | 1.71 |
| 1422 | The TWIN SISTERS WATCHED a MOVIE.             | 8  | 5 | 109.00 | 97.25  | 1.86 | 1.79 | 1.66 |
| 1423 | The AUTHOR WROTE a LONG NOVEL.                | 8  | 2 | 44.00  | 50.50  | 1.97 | 1.74 | 1.56 |
| 1424 | The SAD CHILD was TIRED and LONELY.           | 10 | 2 | 19.00  | 68.75  | 2.16 | 2.17 | 1.83 |
| 1425 | The DRIVER STOPPED SUDDENLY in the STREET.    | 10 | 4 | 23.00  | 29.00  | 2.32 | 2.26 | 1.77 |
| 1501 | The WAITRESS SMOKED DURING her BREAK.         | 8  | 2 | 21.00  | 22.75  | 2.06 | 2.12 | 1.70 |
| 1502 | That FAST KITTEN CHASED a MOUSE.              | 7  | 5 | 2.00   | 10.25  | 2.13 | 2.08 | 1.66 |
| 1503 | The CHEAP CLOTHES LOOKED DIRTY.               | 6  | 2 | 103.50 | 85.75  | 1.86 | 1.92 | 1.33 |

|      |                                               |    |   |        |        |      |      |      |
|------|-----------------------------------------------|----|---|--------|--------|------|------|------|
| 1504 | They LOVED the FRENCH FOOD and DESSERT.       | 8  | 5 | 151.50 | 173.50 | 2.02 | 1.85 | 1.74 |
| 1505 | The ANGRY HUSBAND VISITED a LAWYER.           | 11 | 4 | 30.00  | 34.25  | 2.07 | 2.01 | 1.92 |
| 1506 | The FANS WATCHED FOOTBALL GAMES.              | 6  | 5 | 53.50  | 72.25  | 2.03 | 1.94 | 1.51 |
| 1507 | The UNHAPPY CHILD NEEDS HELP.                 | 8  | 4 | 145.50 | 131.25 | 2.12 | 1.59 | 1.61 |
| 1508 | That BOY CARRIED SIX BAGS.                    | 6  | 3 | 36.00  | 43.25  | 2.10 | 1.90 | 1.86 |
| 1509 | The VEGETABLE SOUP was a HEALTHY LUNCH.       | 10 | 6 | 36.00  | 39.50  | 2.24 | 2.01 | 1.87 |
| 1510 | The FARM TOWN was SMALL and NICE.             | 7  | 3 | 73.00  | 86.00  | 2.19 | 1.80 | 2.23 |
| 1511 | The SUN SHINES in the GREEN FOREST.           | 8  | 5 | 7.50   | 10.25  | 2.26 | 2.34 | 1.64 |
| 1512 | The ITALIAN RESTAURANT is REALLY POPULAR.     | 13 | 1 | 99.50  | 302.50 | 2.31 | 2.15 | 2.08 |
| 1513 | The STRESSFUL WEEK ENDED at the BAR.          | 9  | 3 | 35.00  | 52.00  | 2.10 | 2.08 | 1.80 |
| 1514 | The LONG PROJECT was COMPLETED on TIME.       | 10 | 1 | 62.00  | 208.50 | 2.39 | 2.49 | 1.97 |
| 1515 | The OLD SHIRT was WARM and SOFT.              | 7  | 3 | 11.00  | 54.00  | 2.04 | 1.78 | 1.53 |
| 1516 | Their AUNT BUYS BIRTHDAY GIFTS.               | 6  | 4 | 37.00  | 98.25  | 1.93 | 1.79 | 1.57 |
| 1517 | The FAMILY CELEBRATED their FAVORITE HOLIDAY. | 14 | 4 | 144.50 | 194.00 | 2.37 | 2.38 | 1.96 |
| 1518 | The BROWN BALL FELL off the TABLE.            | 8  | 1 | 19.00  | 15.75  | 1.89 | 2.28 | 1.67 |
| 1519 | The ACTOR SANG LOUDLY in the THEATER.         | 10 | 2 | 31.50  | 32.50  | 2.01 | 1.93 | 1.70 |
| 1520 | The FOUR FRIENDS WENT on VACATION.            | 8  | 5 | 196.50 | 644.75 | 2.20 | 1.88 | 1.81 |
| 1521 | The TEACHER GAVE HOMEWORK DAILY.              | 8  | 3 | 46.00  | 67.50  | 1.81 | 1.91 | 1.57 |

|      |                                              |    |   |        |         |      |      |      |
|------|----------------------------------------------|----|---|--------|---------|------|------|------|
| 1522 | The PREGNANT WOMAN LIKES CHOCOLATE.          | 8  | 2 | 41.50  | 1449.50 | 1.73 | 1.81 | 1.60 |
| 1523 | They ROASTED SALTY MEAT in the PAN.          | 9  | 2 | 8.50   | 31.25   | 2.27 | 2.22 | 1.84 |
| 1524 | Those LITTLE KIDS are TIRED TODAY.           | 9  | 1 | 129.00 | 139.50  | 2.01 | 1.97 | 1.61 |
| 1525 | The DOGS DIG GIANT HOLES.                    | 6  | 4 | 3.00   | 58.00   | 1.83 | 1.85 | 1.46 |
| 1601 | The PERFORMER WORKED for LITTLE MONEY.       | 10 | 1 | 335.00 | 288.50  | 2.04 | 1.98 | 1.56 |
| 1602 | Her SON LOVES TOY CARS.                      | 5  | 4 | 62.00  | 103.75  | 2.03 | 1.74 | 1.69 |
| 1603 | The MATH CLASS SEEMED USEFUL.                | 6  | 5 | 28.00  | 45.75   | 1.76 | 1.73 | 1.58 |
| 1604 | The FOUR COUSINS TRAVELED around the WORLD.  | 10 | 4 | 106.00 | 128.75  | 2.27 | 2.34 | 1.99 |
| 1605 | The STORMY WEATHER DESTROYED the HOME.       | 9  | 4 | 17.50  | 78.25   | 2.03 | 1.86 | 1.53 |
| 1606 | The ADULTS ATE LUNCH QUICKLY.                | 7  | 2 | 22.00  | 85.25   | 1.87 | 1.69 | 1.48 |
| 1607 | The CATHOLIC PRIEST SANG SONGS.              | 7  | 5 | 35.00  | 31.50   | 2.14 | 2.24 | 1.95 |
| 1608 | The ARTIST TOOK a BEAUTIFUL PICTURE.         | 10 | 3 | 49.00  | 137.25  | 2.03 | 1.84 | 1.60 |
| 1609 | The CLEAN KITCHEN has GLASS PLATES.          | 7  | 3 | 7.00   | 10.00   | 2.22 | 2.11 | 1.85 |
| 1610 | He SCREAMED LOUDLY in the CROWDED ROOM.      | 9  | 1 | 12.00  | 13.50   | 2.24 | 2.12 | 1.95 |
| 1611 | The CHERRY PIE was WARM and SWEET.           | 8  | 2 | 8.50   | 9.00    | 2.15 | 1.81 | 1.76 |
| 1612 | The BIG DISH was VERY HOT.                   | 7  | 3 | 200.00 | 327.00  | 1.58 | 1.51 | 1.54 |
| 1613 | The EXCITED CHILDREN CHEERED for their TEAM. | 10 | 3 | 25.50  | 71.75   | 2.49 | 2.14 | 1.98 |
| 1614 | The WAITER BROKE TEN GLASSES.                | 7  | 2 | 17.50  | 30.25   | 1.91 | 1.93 | 1.73 |

|      |                                             |    |   |        |        |      |      |      |
|------|---------------------------------------------|----|---|--------|--------|------|------|------|
| 1615 | The RELIGIOUS COUPLE BELIEVES in GOD.       | 10 | 4 | 49.00  | 46.50  | 2.04 | 1.95 | 1.88 |
| 1616 | The MONKEY WANTS YELLOW BANANAS.            | 9  | 2 | 29.00  | 161.25 | 2.01 | 1.72 | 1.50 |
| 1617 | The BAD NEWS CAME SUDDENLY.                 | 7  | 2 | 45.50  | 126.50 | 1.83 | 1.80 | 1.47 |
| 1618 | The UGLY RATS were QUIET and STILL.         | 9  | 2 | 15.00  | 41.75  | 2.28 | 2.03 | 1.84 |
| 1619 | The GARDENER GREW COLORFUL PEPPERS.         | 10 | 2 | 6.00   | 22.75  | 2.03 | 2.22 | 1.69 |
| 1620 | The SICK PATIENT RECEIVED many FLOWERS.     | 10 | 6 | 10.50  | 14.50  | 2.40 | 2.21 | 2.05 |
| 1621 | My SISTERS are FRIENDLY and ALWAYS TALKING. | 11 | 5 | 138.00 | 125.50 | 2.51 | 2.48 | 1.98 |
| 1622 | The OCEAN LOOKED PERFECTLY CALM.            | 8  | 2 | 10.50  | 37.50  | 2.10 | 1.91 | 1.74 |
| 1623 | The TROPICAL FOREST had MANY TREES.         | 10 | 3 | 13.00  | 84.75  | 2.31 | 2.04 | 1.75 |
| 1624 | Our AUNT BAKES FISH WEEKLY.                 | 6  | 3 | 63.50  | 64.00  | 1.75 | 1.79 | 1.66 |
| 1625 | The SMALL BUSINESS NEEDS SUPPORT.           | 7  | 5 | 59.00  | 91.50  | 1.84 | 1.84 | 1.48 |
| 1701 | The ACTOR WALKED ACROSS the STAGE.          | 8  | 3 | 5.00   | 22.25  | 2.18 | 2.12 | 1.74 |
| 1702 | The COMPANY BUYS FOREIGN CARS.              | 8  | 3 | 76.50  | 116.50 | 2.00 | 1.84 | 1.63 |
| 1703 | The BAKED BREAD TASTED SWEET.               | 6  | 2 | 14.50  | 14.50  | 1.85 | 1.77 | 1.62 |
| 1704 | The SCHOOLS NEED MORE TEACHERS.             | 6  | 4 | 340.50 | 487.00 | 2.01 | 1.76 | 1.57 |
| 1705 | The TALENTED ARTIST DREW a PICTURE.         | 10 | 2 | 9.50   | 12.25  | 2.10 | 2.17 | 1.58 |
| 1706 | The PINK PIG is FAT and LAZY.               | 8  | 2 | 3.00   | 3.50   | 2.04 | 1.78 | 1.68 |
| 1707 | The TWO FRIENDS HIKED up the MOUNTAIN.      | 8  | 3 | 150.50 | 185.25 | 2.08 | 1.91 | 1.55 |

|      |                                          |    |   |        |        |      |      |      |
|------|------------------------------------------|----|---|--------|--------|------|------|------|
| 1708 | The ENGLISH CLASS READS BOOKS.           | 6  | 4 | 104.00 | 169.75 | 1.92 | 1.96 | 1.54 |
| 1709 | The FUNNY TELEVISION SHOW is POPULAR.    | 12 | 4 | 41.00  | 39.50  | 2.14 | 2.17 | 1.73 |
| 1710 | The BLUE HAT was STRANGE and UGLY.       | 8  | 3 | 13.00  | 12.75  | 2.05 | 1.80 | 1.52 |
| 1711 | The PRESIDENT GAVE a SHORT SPEECH.       | 8  | 5 | 53.50  | 74.00  | 2.07 | 1.82 | 1.69 |
| 1712 | The YOUNG WOMAN is VERY SMART.           | 8  | 2 | 110.50 | 274.25 | 1.67 | 1.48 | 1.53 |
| 1713 | The DIVORCED COUPLE SAT at the TABLE.    | 10 | 2 | 30.00  | 29.50  | 2.16 | 1.89 | 1.55 |
| 1714 | That GOAT FELL in the DEEP HOLE.         | 7  | 2 | 5.50   | 9.25   | 1.82 | 1.60 | 1.63 |
| 1715 | The GROUP HEARD SLOW MUSIC.              | 6  | 3 | 71.00  | 105.75 | 1.96 | 1.47 | 1.44 |
| 1716 | The HUGE SUPERMARKET OPENS TOMORROW.     | 11 | 4 | 37.50  | 32.75  | 2.24 | 2.21 | 1.84 |
| 1717 | She SPEAKS MANY DIFFERENT LANGUAGES.     | 9  | 5 | 262.50 | 296.75 | 2.18 | 2.16 | 1.72 |
| 1718 | The MOUSE FOUND TASTY CHEESE.            | 6  | 5 | 15.00  | 43.75  | 1.91 | 1.71 | 1.66 |
| 1719 | The VEGETABLES GREW in the GREEN GARDEN. | 10 | 2 | 28.50  | 35.75  | 2.24 | 1.99 | 1.75 |
| 1720 | The FATHER and DAUGHTER SAW the MOVIE.   | 10 | 4 | 110.00 | 207.00 | 2.12 | 1.99 | 1.60 |
| 1721 | The HOT SUN WARMED the POOL.             | 6  | 2 | 16.00  | 20.75  | 1.87 | 1.91 | 1.54 |
| 1722 | The CHICKEN SANDWICH CAME with SALAD.    | 9  | 4 | 50.50  | 130.50 | 2.16 | 1.99 | 1.60 |
| 1723 | The TEN GIFTS were COMPLETELY BROKEN.    | 9  | 2 | 28.00  | 38.75  | 2.10 | 2.15 | 1.71 |
| 1724 | The DEDICATED NURSES HELP PATIENTS.      | 10 | 5 | 6.50   | 20.50  | 2.57 | 2.18 | 2.07 |
| 1725 | The LESSON SEEMED TOO DIFFICULT.         | 8  | 3 | 56.50  | 142.00 | 1.81 | 1.65 | 1.61 |

|      |                                               |    |   |        |        |      |      |      |
|------|-----------------------------------------------|----|---|--------|--------|------|------|------|
| 1801 | The ONLY HOTEL is FAR and EXPENSIVE.          | 11 | 5 | 96.50  | 131.25 | 2.61 | 2.44 | 2.16 |
| 1802 | The AUTHOR WROTE THIRTY BOOKS.                | 7  | 3 | 56.50  | 48.75  | 1.89 | 1.69 | 1.67 |
| 1803 | The SPICY MEAL TASTED GREAT.                  | 7  | 3 | 51.00  | 50.75  | 1.80 | 1.75 | 1.56 |
| 1804 | Our BAND PRACTICES in my SMALL GARAGE.        | 10 | 4 | 23.50  | 35.25  | 2.49 | 2.67 | 2.33 |
| 1805 | Our BUSY DAUGHTER JOINED many CLUBS.          | 9  | 3 | 39.00  | 41.25  | 2.31 | 2.08 | 1.89 |
| 1806 | The BUTCHER SELLS ITALIAN MEAT.               | 8  | 3 | 26.00  | 40.50  | 1.73 | 1.64 | 1.47 |
| 1807 | A FAITHFUL HUSBAND is ALWAYS HAPPY.           | 10 | 7 | 47.00  | 78.00  | 2.21 | 2.09 | 1.69 |
| 1808 | The KIND LADY GIVES ADVICE.                   | 7  | 4 | 91.50  | 139.75 | 1.88 | 1.71 | 1.66 |
| 1809 | Her RIGHT ARM and LEG were BROKEN.            | 8  | 0 | 18.50  | 95.50  | 1.95 | 1.92 | 1.53 |
| 1810 | The PHONE MADE a LOUD NOISE.                  | 6  | 2 | 36.00  | 105.75 | 1.81 | 1.54 | 1.46 |
| 1811 | The ENGLISH PROFESSOR never ASSIGNS HOMEWORK. | 12 | 5 | 18.00  | 115.00 | 2.52 | 2.37 | 2.06 |
| 1812 | The CURIOUS VISITOR TRAVELED to the CITY.     | 13 | 5 | 156.50 | 138.25 | 2.30 | 2.35 | 1.96 |
| 1813 | The SICK NEIGHBOR ASKS for HELP.              | 7  | 3 | 52.50  | 48.75  | 1.73 | 1.68 | 1.66 |
| 1814 | The CATS DRINK WARM MILK.                     | 5  | 1 | 35.00  | 50.25  | 1.56 | 1.76 | 1.33 |
| 1815 | The AMAZING DOCTOR SAVES LIVES.               | 8  | 6 | 61.00  | 67.50  | 2.05 | 2.00 | 1.92 |
| 1816 | The LIGHTNING ENDED the SOCCER GAME.          | 9  | 1 | 52.50  | 57.00  | 1.85 | 1.75 | 1.47 |
| 1817 | Our BEST PLAYER WON the AWARD.                | 8  | 1 | 2.00   | 73.25  | 1.84 | 1.91 | 1.66 |
| 1818 | The KEYS DISAPPEARED in the ORANGE BOX.       | 10 | 4 | 5.00   | 13.25  | 2.37 | 2.36 | 2.14 |

|      |                                                 |    |   |        |        |      |      |      |
|------|-------------------------------------------------|----|---|--------|--------|------|------|------|
| 1819 | The MARKET was CROWDED and TOO FAR.             | 9  | 0 | 36.00  | 133.25 | 2.21 | 2.10 | 1.89 |
| 1820 | The OLD PINK SHIRT had no BUTTONS.              | 8  | 2 | 5.50   | 49.75  | 2.40 | 2.11 | 1.98 |
| 1821 | The TWO WAITERS SERVED BREAKFAST.               | 7  | 5 | 10.50  | 115.25 | 2.06 | 2.08 | 1.74 |
| 1822 | The RAIN LASTED for MANY WEEKS.                 | 8  | 2 | 103.00 | 129.75 | 2.16 | 1.96 | 1.77 |
| 1823 | The HARDWORKING FARMER CUT the CORN.            | 9  | 2 | 6.50   | 7.75   | 2.16 | 2.06 | 1.79 |
| 1824 | The APPLE FELL on the WOOD FLOOR.               | 8  | 2 | 14.50  | 15.25  | 1.96 | 1.70 | 1.74 |
| 1825 | The COFFEE CAKE was a PERFECT DESSERT.          | 10 | 3 | 12.00  | 15.50  | 2.08 | 1.88 | 1.79 |
| 1901 | That NEW STUDENT is QUIET and SHY.              | 9  | 2 | 71.00  | 130.00 | 2.28 | 2.05 | 1.96 |
| 1902 | The FAMILY LOST THEIR PET.                      | 6  | 3 | 239.00 | 230.50 | 1.62 | 1.50 | 1.33 |
| 1903 | The JAZZ SINGER SOUNDED GREAT.                  | 7  | 4 | 45.00  | 41.25  | 1.75 | 1.53 | 1.53 |
| 1904 | The TWINS RECEIVED the SAME GIFT.               | 7  | 5 | 16.00  | 95.25  | 2.05 | 2.16 | 1.71 |
| 1905 | The OFFICE PHONE RANG OFTEN.                    | 7  | 4 | 39.00  | 35.00  | 1.84 | 1.65 | 1.53 |
| 1906 | The GOLD RING FIT her FINGER.                   | 7  | 2 | 4.00   | 4.50   | 1.77 | 1.47 | 1.47 |
| 1907 | The PUPPY SLEPT PEACEFULLY on the BED.          | 10 | 3 | 5.50   | 16.50  | 2.21 | 2.16 | 1.79 |
| 1908 | A HUNGRY RABBIT EATS CARROTS.                   | 8  | 3 | 4.50   | 76.75  | 2.00 | 1.82 | 1.63 |
| 1909 | The PLASTIC PLATE and CUP were CHEAP.           | 8  | 2 | 13.00  | 29.00  | 2.20 | 2.00 | 1.74 |
| 1910 | The FIRST QUESTION was CONFUSING and DIFFICULT. | 12 | 7 | 72.50  | 94.50  | 2.88 | 2.48 | 2.22 |
| 1911 | Their NEIGHBORS TELL INTERESTING STORIES.       | 9  | 4 | 47.00  | 56.25  | 2.33 | 1.95 | 1.74 |

|      |                                            |    |   |        |        |      |      |      |
|------|--------------------------------------------|----|---|--------|--------|------|------|------|
| 1912 | The RED APPLE is TOO SMALL.                | 7  | 1 | 85.00  | 157.00 | 1.99 | 1.62 | 1.61 |
| 1913 | A PRETTY BOAT went DOWN the RIVER.         | 9  | 1 | 41.50  | 62.25  | 1.99 | 1.84 | 1.64 |
| 1914 | The BORED CHILDREN LISTENED to MUSIC.      | 9  | 3 | 160.50 | 151.75 | 2.23 | 2.13 | 1.72 |
| 1915 | My GRANDFATHER MADE WOODEN CHAIRS.         | 8  | 4 | 7.00   | 89.00  | 2.17 | 2.02 | 1.77 |
| 1916 | The LIGHT BLUE JEANS are not EXPENSIVE.    | 9  | 5 | 16.00  | 49.00  | 2.21 | 2.42 | 2.02 |
| 1917 | My BROTHER JOINED the FUN GAME.            | 7  | 3 | 76.50  | 69.00  | 1.94 | 1.81 | 1.64 |
| 1918 | The FRIENDLY BABY HUGS EVERYONE.           | 9  | 4 | 30.50  | 31.75  | 1.98 | 1.88 | 1.67 |
| 1919 | Our BUSINESS PAID for the DAILY NEWSPAPER. | 11 | 3 | 16.00  | 68.25  | 2.33 | 2.47 | 1.82 |
| 1920 | The RICE and BEANS LOOKED DRY.             | 6  | 2 | 60.00  | 62.00  | 1.95 | 1.76 | 1.59 |
| 1921 | The NURSES WORK HARD every DAY.            | 8  | 3 | 295.50 | 269.75 | 1.93 | 2.06 | 1.59 |
| 1922 | The TALL WOMAN WALKED AWAY.                | 7  | 0 | 72.00  | 57.00  | 1.79 | 1.72 | 1.31 |
| 1923 | The BIRD FLEW OVER the SEA.                | 7  | 3 | 28.50  | 109.00 | 1.77 | 1.56 | 1.42 |
| 1924 | The COUPLE SANG the SONG WELL.             | 7  | 2 | 52.00  | 170.00 | 1.93 | 1.67 | 1.54 |
| 1925 | The ARTIST STUDIES ITALIAN and FRENCH.     | 10 | 5 | 28.00  | 60.50  | 2.51 | 2.35 | 1.99 |
| 2001 | My UNCLE KNOWS ABOUT the WAR.              | 8  | 1 | 222.00 | 687.75 | 1.80 | 1.67 | 1.47 |
| 2002 | The PLAYER KICKED the SOCCER BALL.         | 8  | 1 | 70.00  | 108.50 | 1.90 | 1.76 | 1.46 |
| 2003 | The HELPFUL NANNY CLEANED the HOUSE.       | 8  | 3 | 13.50  | 74.25  | 1.95 | 1.96 | 1.81 |
| 2004 | The RED GRAPES are BIG and TASTY.          | 8  | 2 | 41.50  | 107.50 | 1.99 | 1.90 | 1.67 |

|      |                                               |    |   |        |        |      |      |      |
|------|-----------------------------------------------|----|---|--------|--------|------|------|------|
| 2005 | The THIRSTY PIG DRANK WATER.                  | 7  | 2 | 26.00  | 26.25  | 1.85 | 1.66 | 1.48 |
| 2006 | Our FAMILIES CELEBRATED the HOLIDAY TOGETHER. | 14 | 5 | 242.50 | 254.50 | 2.90 | 2.65 | 2.24 |
| 2007 | The RICH DENTIST BOUGHT new TOOLS.            | 7  | 3 | 21.50  | 85.50  | 2.23 | 2.20 | 1.86 |
| 2008 | The LAST DAY was CRAZY and FUN.               | 8  | 3 | 83.50  | 166.75 | 2.17 | 1.94 | 1.51 |
| 2009 | The TEACHER CHOOSES DIFFICULT QUESTIONS.      | 10 | 8 | 57.50  | 63.75  | 2.42 | 2.27 | 1.89 |
| 2010 | That DEEP LAKE is QUITE COLD.                 | 6  | 0 | 16.50  | 17.50  | 1.85 | 1.89 | 1.82 |
| 2011 | A LITTLE RABBIT RUNS through the FOREST.      | 11 | 3 | 33.50  | 34.25  | 2.14 | 2.05 | 1.80 |
| 2012 | The WORKER HURT his LEFT HAND.                | 7  | 3 | 24.50  | 135.25 | 2.00 | 1.66 | 1.58 |
| 2013 | His SPEECH was BORING and TOO LONG.           | 8  | 2 | 101.00 | 168.50 | 2.27 | 1.88 | 1.92 |
| 2014 | The LEAVES CHANGE COLOR in the FALL.          | 8  | 5 | 30.50  | 43.50  | 1.94 | 1.90 | 1.64 |
| 2015 | The ARTIST DREW on the YELLOW PAPER.          | 10 | 1 | 16.00  | 18.75  | 2.12 | 2.31 | 1.54 |
| 2016 | The TEAM SCORED GOALS EASILY.                 | 7  | 3 | 23.00  | 38.25  | 1.95 | 1.93 | 1.56 |
| 2017 | He CUT the STEAK WITH a KNIFE.                | 7  | 3 | 10.50  | 254.50 | 1.79 | 1.58 | 1.42 |
| 2018 | The SOFT MUSIC PLEASED EVERYONE.              | 8  | 5 | 35.50  | 84.00  | 2.09 | 2.04 | 1.83 |
| 2019 | The SHY GUEST SPEAKS QUIETLY.                 | 7  | 4 | 10.50  | 60.00  | 2.14 | 2.08 | 1.70 |
| 2020 | My AUNT RAISED FIVE CHILDREN.                 | 6  | 4 | 101.00 | 114.75 | 1.78 | 1.92 | 1.65 |
| 2021 | The HORRIBLE NEWS UPSET my GRANDPARENTS.      | 11 | 4 | 7.00   | 16.75  | 2.66 | 2.20 | 2.24 |
| 2022 | Their OLDEST DAUGHTER PLAYS with TOYS.        | 8  | 3 | 133.50 | 140.00 | 2.09 | 2.40 | 1.91 |

|      |                                      |   |   |        |        |      |      |      |
|------|--------------------------------------|---|---|--------|--------|------|------|------|
| 2023 | The FUNNY MOVIE will END SOON.       | 8 | 3 | 26.00  | 46.50  | 1.88 | 1.73 | 1.59 |
| 2024 | The SCARED MOUSE STAYED in the HOLE. | 7 | 4 | 17.50  | 41.50  | 2.08 | 1.73 | 1.79 |
| 2025 | The MEAN PEOPLE BROKE the RULES.     | 7 | 1 | 336.50 | 473.75 | 1.93 | 1.72 | 1.74 |

<sup>a</sup>Age 27, White, female. <sup>b</sup>Age 34, White, male.
