# Supplementary material
Source: publisher figshare collection journal article supplement (https://asha.figshare.com/articles/dataset/_/6170381)
Supplement: Supplementary file 2 [file 1]

<<SUPPLEMENTAL MATERIAL, APPENDIX A>>

**Supplemental Material Table A1.** Demographic and linguistic background information for the 100 non-native English speakers who participated in the development of the lexicon.

| Subject ID | Gender | Ethnicity | Race | Native language | Birth country | Age of Eng. acquisition | Yrs of Eng. experience | Language of education |                 |                 |          | Occupation               | Number of conversational topics | Total amt of speaking time (sec) | Number of unique words spoken |
|------------|--------|-----------|------|-----------------|---------------|-------------------------|------------------------|-----------------------|-----------------|-----------------|----------|--------------------------|---------------------------------|----------------------------------|-------------------------------|
|            |        |           |      |                 |               |                         |                        | Primary               | Secondary       | University      | Graduate |                          |                                 |                                  |                               |
| NN01       | F      | H         | C    | Spanish         | Ecuador       | 30                      | 19                     | Spanish               | Spanish         | Spanish         | N/A      | Bookkeeper               | 3                               | 437                              | 173                           |
| NN02       | F      | H         | C    | Spanish         | Colombia      | 7                       | 7                      | Spanish               | Spanish         | Spanish         | Spanish  | Microbiologist           | 2                               | 981                              | 364                           |
| NN03       | M      | —         | A    | Korean          | South Korea   | 14                      | 3.5                    | Korean                | Korean          | Korean/English  | N/A      | Driver                   | 2                               | 526                              | 137                           |
| NN04       | F      | H         | —    | Spanish         | Peru          | 7                       | 21                     | Spanish/English       | Spanish         | Spanish/English | N/A      | Caregiver                | 8                               | 1,630                            | 614                           |
| NN05       | F      | H         | C    | Spanish         | Peru          | 5                       | 42                     | Spanish               | English         | N/A             | N/A      | Caregiver relations      | 9                               | 2,271                            | 494                           |
| NN06       | F      | NH        | A    | Chinese         | China         | 15                      | 6                      | Chinese               | Chinese         | English         | N/A      | FT student; receptionist | 4                               | 1,098                            | 404                           |
| NN07       | F      | H         | C    | Spanish         | Colombia      | 14                      | 10                     | Spanish               | Spanish/English | English         | N/A      | FT student               | 6                               | 2,191                            | 633                           |
| NN08       | F      | NH        | C    | Russian         | Tajikistan    | 4                       | 16                     | English               | English         | English         | N/A      | FT student; hair stylist | 10                              | 1,773                            | 816                           |
| NN09       | M      | H         | C    | Spanish         | Ecuador       | 19                      | 8                      | Spanish               | Spanish         | Spanish         | N/A      | Taxi driver              | 9                               | 758                              | 425                           |
| NN10       | F      | H         | C    | Spanish         | Colombia      | 10                      | 12                     | Spanish               | English         | English         | N/A      | FT student               | 10                              | 2,481                            | 900                           |
| NN11       | M      | NH        | C    | Polish          | Poland        | 10                      | 9                      | Polish/English        | English         | English         | N/A      | FT student               | 8                               | 854                              | 552                           |

|      |   |    |   |                 |            |     |      |                     |                     |                         |         |                        |    |       |     |
|------|---|----|---|-----------------|------------|-----|------|---------------------|---------------------|-------------------------|---------|------------------------|----|-------|-----|
| NN12 | M | H  | C | Spanish         | Peru       | 7   | 18   | Spanish/<br>English | Spanish/<br>English | Spanish                 | N/A     | Accountant             | 9  | 982   | 460 |
| NN13 | F | H  | C | Spanish         | Peru       | 5   | 9    | Spanish             | Spanish             | Spanish                 | N/A     | Retired                | 9  | 923   | 362 |
| NN14 | F | H  | — | Spanish         | Peru       | 5   | 32   | Spanish             | Spanish             | Spanish                 | Spanish | Retired                | 9  | 421   | 256 |
| NN15 | F | H  | C | Spanish         | Peru       | 5   | 11   | Spanish             | Spanish             | Spanish                 | N/A     | House<br>administrator | 8  | 828   | 415 |
| NN16 | M | H  | C | Spanish         | Colombia   | 28  | 27.5 | Spanish             | N/A                 | N/A                     | N/A     | Electrician            | 5  | 1,022 | 239 |
| NN17 | M | NH | C | Urdu/<br>Hindko | Pakistan   | 17  | 3.5  | Urdu                | Urdu                | Hindko/Urdu<br>/English | N/A     | PT student             | 5  | 1,766 | 650 |
| NN18 | F | NH | C | Italian         | Italy      | N/A | 24   | Italian             | Italian             | N/A                     | N/A     | Housewife              | 5  | 687   | 336 |
| NN19 | M | NH | C | Italian         | Italy      | 16  | 28   | Italian             | Italian             | N/A                     | N/A     | Demolition<br>worker   | 5  | 738   | 341 |
| NN20 | F | NH | C | Croatian        | Croatia    | 11  | 44   | Croatian            | Croatian            | N/A                     | N/A     | Bookkeeper             | 5  | 589   | 282 |
| NN21 | M | NH | C | Croatian        | Croatia    | 25  | 38   | Croatian            | N/A                 | N/A                     | N/A     | Carpenter              | 5  | 354   | 226 |
| NN22 | F | H  | C | Spanish         | Chile      | 32  | 10   | Spanish             | Spanish             | English                 | N/A     | FT student;<br>singer  | 17 | 2,232 | 671 |
| NN23 | F | NH | C | Greek           | Greece     | 16  | 44   | Greek               | Greek               | N/A                     | N/A     | Home attendant         | 5  | 680   | 219 |
| NN24 | F | H  | C | Spanish         | Guatemala  | 18  | 35   | Spanish             | Spanish             | N/A                     | N/A     | Room attendant         | 20 | 1631  | 465 |
| NN25 | F | NH | A | Korean          | Korea      | 14  | 10   | Korean              | Korean              | Korean/<br>English      | N/A     | FT student             | 5  | 361   | 226 |
| NN26 | M | NH | — | Arabic          | Pakistan   | 5   | 26   | English/<br>Urdu    | English/<br>Urdu    | English                 | N/A     | Business<br>associate  | 6  | 455   | 295 |
| NN27 | M | NH | C | Russian         | Kazakhstan | 14  | 13   | Russian             | Hebrew              | English                 | English | FT student             | 5  | 687   | 412 |

|      |   |    |    |          |                |    |    |         |                    |                    |      |                                 |    |       |     |
|------|---|----|----|----------|----------------|----|----|---------|--------------------|--------------------|------|---------------------------------|----|-------|-----|
| NN28 | F | H  | -- | Spanish  | Puerto Rico    | 6  | 30 | —       | —                  | —                  | —    | Security officer;<br>PT student | 8  | 1,193 | 548 |
| NN29 | F | NH | A  | Bengali  | Bangladesh     | 6  | 30 | —       | —                  | —                  | —    | PT college<br>student           | 6  | 641   | 387 |
| NN30 | M | NH | A  | Korean   | South<br>Korea | 17 | 13 | Korean  | Korean/<br>English | English            | N/A  | FT student                      | 4  | 888   | 426 |
| NN31 | M | NH | A  | Mandarin | China          | 11 | 16 | Chinese | Chinese            | Chinese            | N/A  | FT student                      | 20 | 1,794 | 631 |
| NN32 | M | NH | A  | Korean   | South<br>Korea | 10 | 13 | Korean  | Korean             | Korean/<br>English | N/A  | FT student                      | 20 | 2,412 | 754 |
| NN33 | F | H  | C  | Spanish  | Ecuador        | 34 | 34 | —       | —                  | —                  | —    | Stay-at-home<br>mom             | 20 | 2,863 | 577 |
| NN34 | F | NH | C  | Polish   | Poland         | 18 | 7  | Polish  | Polish/<br>English | English            | N/A  | FT student;<br>dental assistant | 20 | 2,544 | 774 |
| NN35 | F | H  | C  | Spanish  | Ecuador        | 5  | 14 | Spanish | English            | English            | N/A  | FT student; PT<br>office job    | 15 | 1,783 | 793 |
| NN36 | F | H  | C  | Spanish  | Peru           | 5  | 13 | English | English            | English            | N/A  | FT student                      | 15 | 2,074 | 909 |
| NN37 | M | NH | A  | Urdu     | Pakistan       | 4  | 13 | English | English            | English            | N/A  | FT student                      | 14 | 1,315 | 712 |
| NN38 | M | —  | —  | Urdu     | Pakistan       | 8  | 11 | Urdu    | English            | English            | N/A  | FT student                      | 14 | 978   | 505 |
| NN39 | F | NH | C  | Hebrew   | Israel         | 8  | 20 | Hebrew  | Hebrew             | Hebrew/<br>English | N/A  | FT student                      | 6  | 367   | 236 |
| NN40 | F | NH | A  | Chinese  | China          | 12 | 8  | —       | —                  | —                  | —    | —                               | 6  | 256   | 171 |
| NN41 | M | H  | C  | Spanish  | Mexico         | 19 | 13 | Spanish | Spanish            | Spanish            | N/A  | Waiter                          | 6  | 218   | 153 |
| NN42 | F | NH | A  | Thai     | Thailand       | 7  | 12 | Thai    | Thai               | Thai               | Thai | FT employee                     | 6  | 488   | 184 |
| NN43 | M | H  | C  | Spanish  | Mexico         | 16 | 14 | Spanish | Spanish            | N/A                | N/A  | Waiter                          | 6  | 221   | 187 |

|      |   |    |   |           |             |    |      |          |                 |                  |         |                                  |    |       |     |
|------|---|----|---|-----------|-------------|----|------|----------|-----------------|------------------|---------|----------------------------------|----|-------|-----|
| NN44 | M | H  | C | Spanish   | Mexico      | 17 | 13.5 | Spanish  | Spanish         | N/A              | N/A     | Restaurant chef                  | 6  | 160   | 128 |
| NN45 | F | NH | A | Chinese   | China       | 10 | 63   | Chinese  | Chinese         | N/A              | N/A     | Waitress                         | 6  | 114   | 84  |
| NN46 | M | NH | A | Korean    | South Korea | 7  | 10   | Korean   | Korean          | Korean/English   | N/A     | FT student                       | 20 | 2,111 | 646 |
| NN47 | M | H  | — | Spanish   | Bolivia     | 20 | 3    | Spanish  | Spanish         | English          | N/A     | FT student                       | 20 | 1,571 | 673 |
| NN48 | M | NH | A | Fujianese | China       | 11 | 19   | Mandarin | Mandarin        | Mandarin/English | N/A     | FT student                       | 12 | 1,525 | 243 |
| NN49 | M | NH | A | Korean    | Korea       | 12 | 6    | Korean   | Korean          | Korean           | N/A     | FT student                       | 20 | 2,630 | 705 |
| NN50 | F | NH | A | Korean    | Korea       | 12 | 8    | Korean   | Korean          | Korean           | N/A     | FT student                       | 20 | 1,394 | 495 |
| NN51 | M | NH | A | Chinese   | China       | 12 | 6    | Chinese  | English/Chinese | Chinese          | N/A     | FT student                       | 20 | 1,808 | 640 |
| NN52 | M | NH | A | Korean    | Korea       | 13 | 12.5 | Korean   | Korean          | Korean           | N/A     | FT student                       | 20 | 1,570 | 544 |
| NN53 | M | NH | A | Korean    | Korea       | 11 | 10   | Korean   | Korean          | Korean           | N/A     | FT student                       | 20 | 1,759 | 595 |
| NN54 | F | NH | A | Mandarin  | China       | 12 | 16   | Mandarin | Mandarin        | Mandarin/English | N/A     | FT student                       | 17 | 1,322 | 478 |
| NN55 | F | H  | C | Spanish   | Costa Rica  | 39 | 3.5  | Spanish  | Spanish         | Spanish          | N/A     | FT student;<br>Cleans houses     | 4  | 618   | 337 |
| NN56 | F | NH | C | Russian   | Uzbekistan  | 11 | 18   | Russian  | Russian         | Russian          | Russian | Cosmetologist<br>and esthetician | 5  | 616   | 220 |
| NN57 | M | NH | C | Russian   | Uzbekistan  | 12 | 21   | Russian  | Russian         | Russian          | Russian | Jeweler                          | 5  | 159   | 155 |
| NN58 | F | NH | C | Russian   | Uzbekistan  | 8  | 24   | Russian  | Russian         | English          | English | Registered<br>nurse              | 5  | 188   | 193 |

|      |   |    |   |          |             |    |      |                 |                |         |         |                        |   |     |     |
|------|---|----|---|----------|-------------|----|------|-----------------|----------------|---------|---------|------------------------|---|-----|-----|
| NN59 | F | NH | C | Russian  | Uzbekistan  | 23 | 16   | Russian         | Russian        | English | N/A     | Occupational therapist | 5 | 300 | 243 |
| NN60 | F | NH | C | Russian  | Uzbekistan  | 13 | 36   | Russian         | Russian        | Russian | N/A     | Nurse assistant        | 5 | 124 | 123 |
| NN61 | M | NH | C | Russian  | Uzbekistan  | 23 | 16   | Russian         | Russian        | Russian | N/A     | Jeweler                | 2 | 116 | 97  |
| NN62 | F | NH | A | Korean   | South Korea | 7  | 14.5 | Korean          | Korean         | English | English | FT graduate student    | 4 | 687 | 376 |
| NN63 | F | NH | A | Korean   | South Korea | 5  | 19   | Korean          | English        | English | English | FT graduate student    | 4 | 245 | 240 |
| NN64 | F | NH | A | Korean   | South Korea | 9  | 13   | Korean/English  | English        | English | N/A     | FT student             | 4 | 411 | 347 |
| NN65 | M | NH | A | Korean   | South Korea | 12 | 8    | Korean          | English        | English | N/A     | FT student             | 4 | 391 | 292 |
| NN66 | F | NH | A | Korean   | South Korea | 13 | 11   | Korean          | Korean/English | English | N/A     | FT student             | 4 | 531 | 261 |
| NN67 | F | NH | A | Korean   | South Korea | 10 | 13   | Korean          | English        | English | N/A     | FT student             | 4 | 336 | 222 |
| NN68 | F | NH | A | Korean   | South Korea | 9  | 13.5 | Korean          | Korean         | English | N/A     | FT student             | 4 | 451 | 249 |
| NN69 | M | NH | A | Korean   | South Korea | 25 | 15   | Korean          | Korean         | English | N/A     | Student                | 4 | 394 | 239 |
| NN70 | F | NH | A | Korean   | South Korea | 9  | 6    | Korean          | Korean/English | English | N/A     | Student                | 4 | 313 | 175 |
| NN71 | F | NH | A | Chinese  | Hong Kong   | 7  | 49   | Chinese/English | English        | N/A     | N/A     | Account manager        | 4 | 562 | 330 |
| NN72 | M | NH | A | Chinese  | Hong Kong   | 6  | 12   | Chinese         | Chinese        | N/A     | N/A     | Freight forwarder      | 4 | 509 | 221 |
| NN73 | F | NH | A | Mandarin | Taiwan      | 14 | 10.5 | Mandarin        | Mandarin       | English | English | FT graduate student    | 4 | 906 | 493 |

|      |   |    |   |           |             |    |      |                   |                   |                 |         |                                    |    |       |      |
|------|---|----|---|-----------|-------------|----|------|-------------------|-------------------|-----------------|---------|------------------------------------|----|-------|------|
| NN74 | M | NH | A | Korean    | South Korea | 14 | 13   | Korean            | Korean            | Korean/English  | N/A     | Cashier                            | 4  | 881   | 324  |
| NN75 | M | NH | A | Korean    | South Korea | 14 | 13.5 | Korean            | Korean            | Korean/English  | N/A     | FT student                         | 4  | 647   | 323  |
| NN76 | M | NH | A | Korean    | South Korea | 14 | 11   | Korean            | Korean            | Korean/English  | N/A     | FT student                         | 4  | 430   | 222  |
| NN77 | F | NH | A | Korean    | South Korea | 15 | 7.5  | Korean            | Korean            | English         | N/A     | FT student                         | 4  | 659   | 353  |
| NN78 | F | NH | — | Spanish   | El Salvador | 20 | 33   | Spanish           | Spanish           | N/A             | N/A     | Housewife                          | 4  | 739   | 329  |
| NN79 | F | NH | A | Chinese   | China       | 13 | 13.5 | Chinese           | Chinese           | Chinese         | Chinese | FT student                         | 4  | 618   | 314  |
| NN80 | F | NH | A | Chinese   | China       | 13 | 19   | Chinese           | Chinese           | Chinese         | Chinese | FT student                         | 4  | 501   | 235  |
| NN81 | M | NH | A | Chinese   | China       | 15 | 7    | Chinese           | English           | N/A             | N/A     | FT student                         | 3  | 174   | 120  |
| NN82 | F | NH | A | Chinese   | China       | 8  | 13   | Cantonese/English | Cantonese/English | N/A             | N/A     | FT student                         | 4  | 248   | 181  |
| NN83 | F | NH | A | Chinese   | China       | 8  | 14.5 | Chinese/English   | Chinese/English   | Chinese/English | N/A     | FT student                         | 4  | 391   | 230  |
| NN84 | F | NH | C | German    | Germany     | 4  | 14   | German            | German/English    | German          | N/A     | Between jobs                       | 4  | 472   | 3439 |
| NN85 | M | H  | C | Spanish   | Mexico      | 12 | 9    | Spanish           | Spanish           | Spanish         | English | Entrepreneur                       | 20 | 2,408 | 768  |
| NN86 | F | NH | A | Mandarin  | Taiwan      | 11 | 11   | Mandarin          | Mandarin          | English         | N/A     | PT student; PT teacher's assistant | 20 | 2,243 | 854  |
| NN87 | M | NH | A | Chinese   | China       | 14 | 8    | Korean            | Korean            | Chinese         | N/A     | FT student                         | 3  | 4,117 | 150  |
| NN88 | M | NH | A | Fujianese | China       | 13 | 9    | Chinese           | English           | English         | N/A     | FT student                         | 3  | 311   | 166  |
| NN89 | M | NH | A | Mandarin  | China       | 11 | 18   | Mandarin          | Mandarin          | Mandarin        | English | FT student                         | 8  | 830   | 421  |

|       |   |    |   |           |                       |    |     |                     |                      |                      |                |                                  |    |       |       |
|-------|---|----|---|-----------|-----------------------|----|-----|---------------------|----------------------|----------------------|----------------|----------------------------------|----|-------|-------|
| NN90  | F | NH | C | German    | Germany               | 11 | 11  | German              | German               | English              | N/A            | FT student;<br>Clerical worker   | 20 | 2,542 | 1,030 |
| NN91  | F | NH | C | Polish    | Poland                | 10 | 20  | Polish              | Polish               | English              | N/A            | FT student; PT<br>office manager | 20 | 2,625 | 1,022 |
| NN92  | M | H  | C | Spanish   | Dominican<br>Republic | 18 | 7.5 | Spanish             | Spanish              | Spanish              | N/A            | FT employee                      | 15 | 1,812 | 610   |
| NN93  | M | NH | A | Mandarin  | China                 | 10 | 11  | Mandarin            | English              | English              | N/A            | FT student                       | 3  | 142   | 167   |
| NN94  | M | NH | A | Fujianese | China                 | 15 | 7   | Mandarin            | Mandarin             | English              | N/A            | FT student                       | 3  | 165   | 112   |
| NN95  | M | H  | C | Spanish   | Mexico                | 6  | 10  | Spanish/<br>English | Spanish              | Spanish              | N/A            | Entrepreneur                     | 2  | 358   | 248   |
| NN96  | F | NH | A | Mandarin  | China                 | 17 | 4   | Mandarin            | Mandarin/<br>English | English              | N/A            | FT student                       | 1  | 86    | 82    |
| NN97  | M | NH | A | Japanese  | Japan                 | 15 | 14  | Japanese            | Japanese             | Japanese/<br>English | English        | FT student                       | 2  | 145   | 155   |
| NN98  | F | NH | A | Korean    | South<br>Korea        | 15 | 3.5 | Korean              | Korean               | Korean               | Korean/English | FT student                       | 2  | 259   | 149   |
| NN99  | M | H  | C | Spanish   | Mexico                | 15 | 5.5 | Spanish             | Spanish              | Spanish              | N/A            | Lawyer                           | 2  | 606   | 146   |
| NN100 | M | H  | C | Spanish   | Mexico                | 14 | 6.5 | Spanish             | Spanish              | Spanish              | N/A            | Entrepreneur                     | 2  | 209   | 129   |

*Note.* Eng. = English; F = female; M = male; H = Hispanic; NH = Non-Hispanic; A = Asian; C = Caucasian; PT = part-time; FT = full-time.
